# Supplementary material for: E6C15 (E = Si–Pb): polycyclic aromatic compounds with three planar tetracoordinate carbons
Source: Royal Society of Chemistry journal article supplement (doi:10.1039/d2cc04915e), 2022-01-01
Supplement: d2cc04915e1.pdf [file d2cc04915e1.pdf]

## **E<sub>6</sub>C<sub>15</sub> (E = Si-Pb): Polycyclic Aromatic Compounds with Three planar Tetracoordinate Carbons**

Diego Inostroza,<sup>a,b</sup> Luis Leyva-Parra<sup>a,b</sup>, Alejandro Vásquez-Espinal<sup>c</sup>, Julia Contreras-García<sup>d</sup>, Zhong-hua Cui,<sup>e,f</sup> Sudip Pan,<sup>g,\*</sup> Venkatesan S. Thimmakondur,<sup>h,\*</sup> and William Tiznado.<sup>a,\*</sup>

<sup>a</sup> *Computational and Theoretical Chemistry Group, Departamento de Ciencias Químicas, Facultad de Ciencias Exactas, Universidad Andres Bello, República 498, Santiago, Chile. E-mail: [wtiznado@unab.cl](mailto:wtiznado@unab.cl)*

<sup>b</sup> *Doctorado en Fisicoquímica Molecular, Facultad de Ciencias Exactas, Universidad Andres Bello, República 275, Santiago, Chile.*

<sup>c</sup> *Química y Farmacia, Facultad de Ciencias de la Salud, Universidad Arturo Prat, Casilla 121, Iquique 1100000, Chile*

<sup>d</sup> *Sorbonne Universités and CNRS, Laboratoire de Chimie Théorique (LCT), 75005 Paris, France.*

<sup>e</sup> *Institute of Atomic and Molecular Physics, Jilin University, Changchun 130023, China.*

<sup>f</sup> *Key Laboratory of Physics and Technology for Advanced Batteries (Ministry of Education), Jilin University, Changchun 130023, China.*

<sup>g</sup> *Fachbereich Chemie, Philipps-Universität Marburg Hans-Meerwein-Straße, 35043 Marburg, Germany. E-mail: [pans@chemie.uni-marburg.de](mailto:pans@chemie.uni-marburg.de)*

<sup>h</sup> *Department of Chemistry and Biochemistry, San Diego State University, San Diego, CA, 92182-1030 USA E-mail: [vthimmakondusamy@sdsu.edu](mailto:vthimmakondusamy@sdsu.edu)*

## Contents

|                                                                                                                                                                                                                                                                                                                                                                                                                                                                                               |    |
|-----------------------------------------------------------------------------------------------------------------------------------------------------------------------------------------------------------------------------------------------------------------------------------------------------------------------------------------------------------------------------------------------------------------------------------------------------------------------------------------------|----|
| <b>Isomerization Energy Decomposition Analysis</b> .....                                                                                                                                                                                                                                                                                                                                                                                                                                      | 4  |
| <b>Scheme S1.</b> The procedure used to explore the potential energy surface using the AUTOMATON program. <sup>7</sup> .....                                                                                                                                                                                                                                                                                                                                                                  | 5  |
| <b>Figures</b> .....                                                                                                                                                                                                                                                                                                                                                                                                                                                                          | 6  |
| <b>Figure S1.</b> Putative global minimum and low-lying isomers of Si <sub>6</sub> C <sub>15</sub> with their point group symmetries. Relative energies are shown in kcal·mol <sup>-1</sup> at PBE0 <sup>8</sup> -D3 <sup>9</sup> /def2-TZVP <sup>10</sup> level, including zero-point energy (ZPE) corrections. ....                                                                                                                                                                         | 6  |
| <b>Figure S2.</b> Putative global minimum and low-lying isomers of Ge <sub>6</sub> C <sub>15</sub> with their point group symmetries. Relative energies are shown in kcal·mol <sup>-1</sup> at PBE0 <sup>8</sup> -D3 <sup>9</sup> /def2-TZVP <sup>10</sup> level including zero-point energy (ZPE) corrections.....                                                                                                                                                                           | 10 |
| <b>Figure S3.</b> Putative global minimum and low-lying isomers of Sn <sub>6</sub> C <sub>15</sub> with their point group symmetries. Relative energies are shown in kcal·mol <sup>-1</sup> at PBE0 <sup>8</sup> -D3 <sup>9</sup> /def2-TZVP <sup>10</sup> level including zero-point energy (ZPE) corrections. ....                                                                                                                                                                          | 14 |
| <b>Figure S4.</b> Putative global minimum and low-lying isomers of Pb <sub>6</sub> C <sub>15</sub> with their point group symmetries. Relative energies are shown in kcal·mol <sup>-1</sup> at PBE0 <sup>8</sup> -D3 <sup>9</sup> /def2-TZVP <sup>10</sup> level including zero-point energy (ZPE) corrections. ....                                                                                                                                                                          | 17 |
| <b>Figure S5.</b> The natural charges (red) for the Si <sub>6</sub> C <sub>15</sub> /Ge <sub>6</sub> C <sub>15</sub> putative global minimum at the PBE0/def2-TZVP level.....                                                                                                                                                                                                                                                                                                                 | 21 |
| <b>Figure S6.</b> The natural charges (red) for the Sn <sub>6</sub> C <sub>15</sub> /Pb <sub>6</sub> C <sub>15</sub> putative global minimum at the PBE0/def2-TZVP level.....                                                                                                                                                                                                                                                                                                                 | 22 |
| <b>Figure S7.</b> Lowest energy structures of E <sub>6</sub> C <sub>15</sub> at ωB97XD/def2-TZVP level (relative energies in kcal·mol <sup>-1</sup> , including the zero-point energy (ZPE) corrections). The bond length in Å (black) and WBI values (blue) at ωB97XD <sup>11</sup> /def2-TZVP level. ....                                                                                                                                                                                   | 23 |
| <b>Figure S9.</b> AdNDP <sup>12,13</sup> analysis of the <b>3</b> (Ge) system ( <i>D</i> <sub>3h</sub> -Ge <sub>6</sub> C <sub>15</sub> ). ON stands for occupation number. Carbon=gray, Germanium=brown.....                                                                                                                                                                                                                                                                                 | 24 |
| <b>Figure S10.</b> AdNDP analysis of <b>4</b> (E) systems (E=Sn, Pb). ON stands for occupation number. Carbon=gray, Silicon=blue. ....                                                                                                                                                                                                                                                                                                                                                        | 25 |
| <b>Figure S11.</b> Different detected ring current circuits for the <i>D</i> <sub>3h</sub> -Si <sub>6</sub> C <sub>15</sub> system (up) and the RCS profiles along the different integration planes (down) were used to estimate their intensity. Computations were performed using the GIMIC program, <sup>14,15</sup> which employs the gauge-including atomic orbital (GIAO) <sup>16</sup> method. To visualize current pathways, we used Paraview 5.10.0 software. <sup>17,18</sup> ..... | 26 |
| <b>Figure S12.</b> Different detected ring current circuits for <i>D</i> <sub>3h</sub> -Ge <sub>6</sub> C <sub>15</sub> system (up) and the RCS profiles along the different integration planes (down) were used to estimate their intensity. ....                                                                                                                                                                                                                                            | 27 |
| <b>Figure S13.</b> Different detected ring current circuits for the <i>C</i> <sub>3</sub> -Sn <sub>6</sub> C <sub>15</sub> system (up) and the RCS profiles along the different integration planes (down) were used to estimate their intensity. ....                                                                                                                                                                                                                                         | 28 |

|                                                                                                                                                                                                                                                                                     |    |
|-------------------------------------------------------------------------------------------------------------------------------------------------------------------------------------------------------------------------------------------------------------------------------------|----|
| <b>Figure S14.</b> Different detected ring current circuits for the $C_3$ - $Pb_6C_{15}$ system (up) and the RCS profiles along the different integration planes (down) were used to estimate their intensity. ....                                                                 | 29 |
| <b>Figure S15.</b> Vector plots visualization of the current density in diverse planes of the $D_{3h}$ - $Si_6C_{15}$ system. Diatropic currents are assumed to circle clockwise. ....                                                                                              | 30 |
| <b>Figure S16.</b> Vector plots visualization of the current density in diverse planes of the $D_{3h}$ - $Ge_6C_{15}$ system. Diatropic currents are assumed to circle clockwise. ....                                                                                              | 31 |
| <b>Figure S17.</b> Vector plots visualization of the current density in diverse planes of the $C_3$ - $Sn_6C_{15}$ system. Diatropic currents are assumed to circle clockwise.....                                                                                                  | 32 |
| <b>Figure S18.</b> Vector plots visualization of the current density in diverse planes of the $C_3$ - $Pb_6C_{15}$ system. Diatropic currents are assumed to circle clockwise.....                                                                                                  | 33 |
| <b>Figure S19.</b> The minimum energy geometries of the complex $[3(Si)]_2$ at PBE0-D3/def2-SVP level. The bond dissociation energies at 0 K ( $D_e$ ) and 298 K, including thermal correction and entropy factors ( $\Delta G^{298K}$ ), are given in $kcal \cdot mol^{-1}$ . .... | 34 |
| <b>Figure S20.</b> Energetic reaction cycle involving the isomerization of $E_6C_{15}$ between isomers <b>3(E)</b> (top) and <b>4(E)</b> (bottom). ....                                                                                                                             | 35 |
| <b>Tables</b> .....                                                                                                                                                                                                                                                                 | 35 |
| <b>Table S1.</b> Results of the IEDA at the PBE0-D3-BJ/ZORA/TZ2P level for the $E_6C_{15}$ systems with $E_6^{12+} + C_{15}^{12-}$ as fragments. <sup>a</sup> .....                                                                                                                 | 35 |
| <b>Table S2.</b> The HOMO-LUMO energy gaps for <b>3(E)</b> and <b>4(E)</b> structures. Values in eV.36                                                                                                                                                                              |    |
| <b>Table S3.</b> Cartesian coordinates of the $E_6C_{18}$ global minima structures at the PBE0-D3/def2-TZVP level. ....                                                                                                                                                             | 36 |
| <b>Table S4.</b> Cartesian coordinates of <b>3(E)</b> and <b>4(E)</b> optimized structures at the PBE0-D3/def2-TZVP level. ....                                                                                                                                                     | 37 |
| <b>Table S5.</b> Cartesian coordinates for <b>3(Si)</b> complexes optimized at the PBE0-D3/def2-TZVP level, except for sandwich and dimer complexes for which def2-SVP is used.....                                                                                                 | 39 |
| <b>References</b> .....                                                                                                                                                                                                                                                             | 43 |

## Isomerization Energy Decomposition Analysis

To gain more insight into the factors that determine the preference of the **3(E)** or **4(E)** isomer, IEDA<sup>1</sup> was performed, which allows decomposing the difference in energy between two isomers ( $\Delta E_{\text{iso}}$ ) into two terms: the distortion energy of the fragments ( $\Delta E_{\text{dist}}$ ) and the change in the interaction energies between the fragments of each isomer ( $\Delta\Delta E_{\text{int}}$ ). The latter term, in turn, is decomposed as the sum of the changes in the orbital ( $\Delta\Delta E_{\text{orb}}$ ) and electrostatic ( $\Delta\Delta V_{\text{elstat}}$ ) interaction, the Pauli repulsion ( $\Delta\Delta E_{\text{Pauli}}$ ) and the dispersion energy ( $\Delta\Delta E_{\text{disp}}$ ). This analysis was performed at the PBE0-D3-BJ/TZ2P-ZORA level<sup>2-5</sup> using ADF2012.<sup>6</sup>

The IEDA results are shown in Table S1, in addition to Figure S20, which shows the thermodynamic cycle that has been considered to perform this analysis where the  $\text{C}_{15}^{12-}$  and  $\text{E}_6^{12+}$  ( $\text{E} = \text{Si}, \text{Ge}, \text{Sn}, \text{Pb}$ ) species have been selected as interacting fragments. According to Figure S20, positive or negative values in Table S1 indicate that the corresponding term favors the **3(E)** and **4(E)** isomers, respectively. According to  $\Delta E_{\text{iso}}$  values, for  $\text{E} = \text{Si}$  and  $\text{Ge}$ , the **3(E)** isomer is  $44.0 \text{ kcal}\cdot\text{mol}^{-1}$  and  $19.9 \text{ kcal}\cdot\text{mol}^{-1}$ , respectively, below the **4(E)** isomer, while for  $\text{E} = \text{Sn}$  and  $\text{Pb}$ , it is the **4(E)** isomer that is  $10.7 \text{ kcal}\cdot\text{mol}^{-1}$  and  $24.2 \text{ kcal}\cdot\text{mol}^{-1}$  lower in energy, which is in good agreement with the relative energies shown in Figure 1. Note that in all cases, the distortion energy of both the  $\text{C}_{15}^{12-}$  and  $\text{E}_6^{12+}$  fragments is positive, i.e., both systems prefer to be in  $D_{3h}$  symmetry. On the other hand, for all cases, the interaction energy and the terms into which it decomposes ( $\Delta\Delta E_{\text{orb}}$ ,  $\Delta\Delta V_{\text{elstat}}$ ,  $\Delta\Delta E_{\text{Pauli}}$ ,  $\Delta\Delta E_{\text{disp}}$ ) favor the **4(E)** isomer (except for the dispersion energy in the  $\text{Sn}_6\text{C}_{15}$  system), so this balance between interaction and distortion energies is what determines the favorability of one isomer over the other. In particular, for  $\text{E} = \text{Si}$  and  $\text{Ge}$ , the distortion energy is much higher than in their heavier analogs, so the better interaction energy in the **4(E)** isomer is not sufficient to compensate for the high energetic cost of deforming the fragments from the  $D_{3h}$  symmetry. While for  $\text{E} = \text{Sn}$  and  $\text{Pb}$  the lower energetic cost of deforming the structure is outweighed by the favorable interaction energy of these fragments in the **4(E)** isomer.

**Scheme S1.** The procedure used to explore the potential energy surface using the AUTOMATON program.<sup>7</sup>

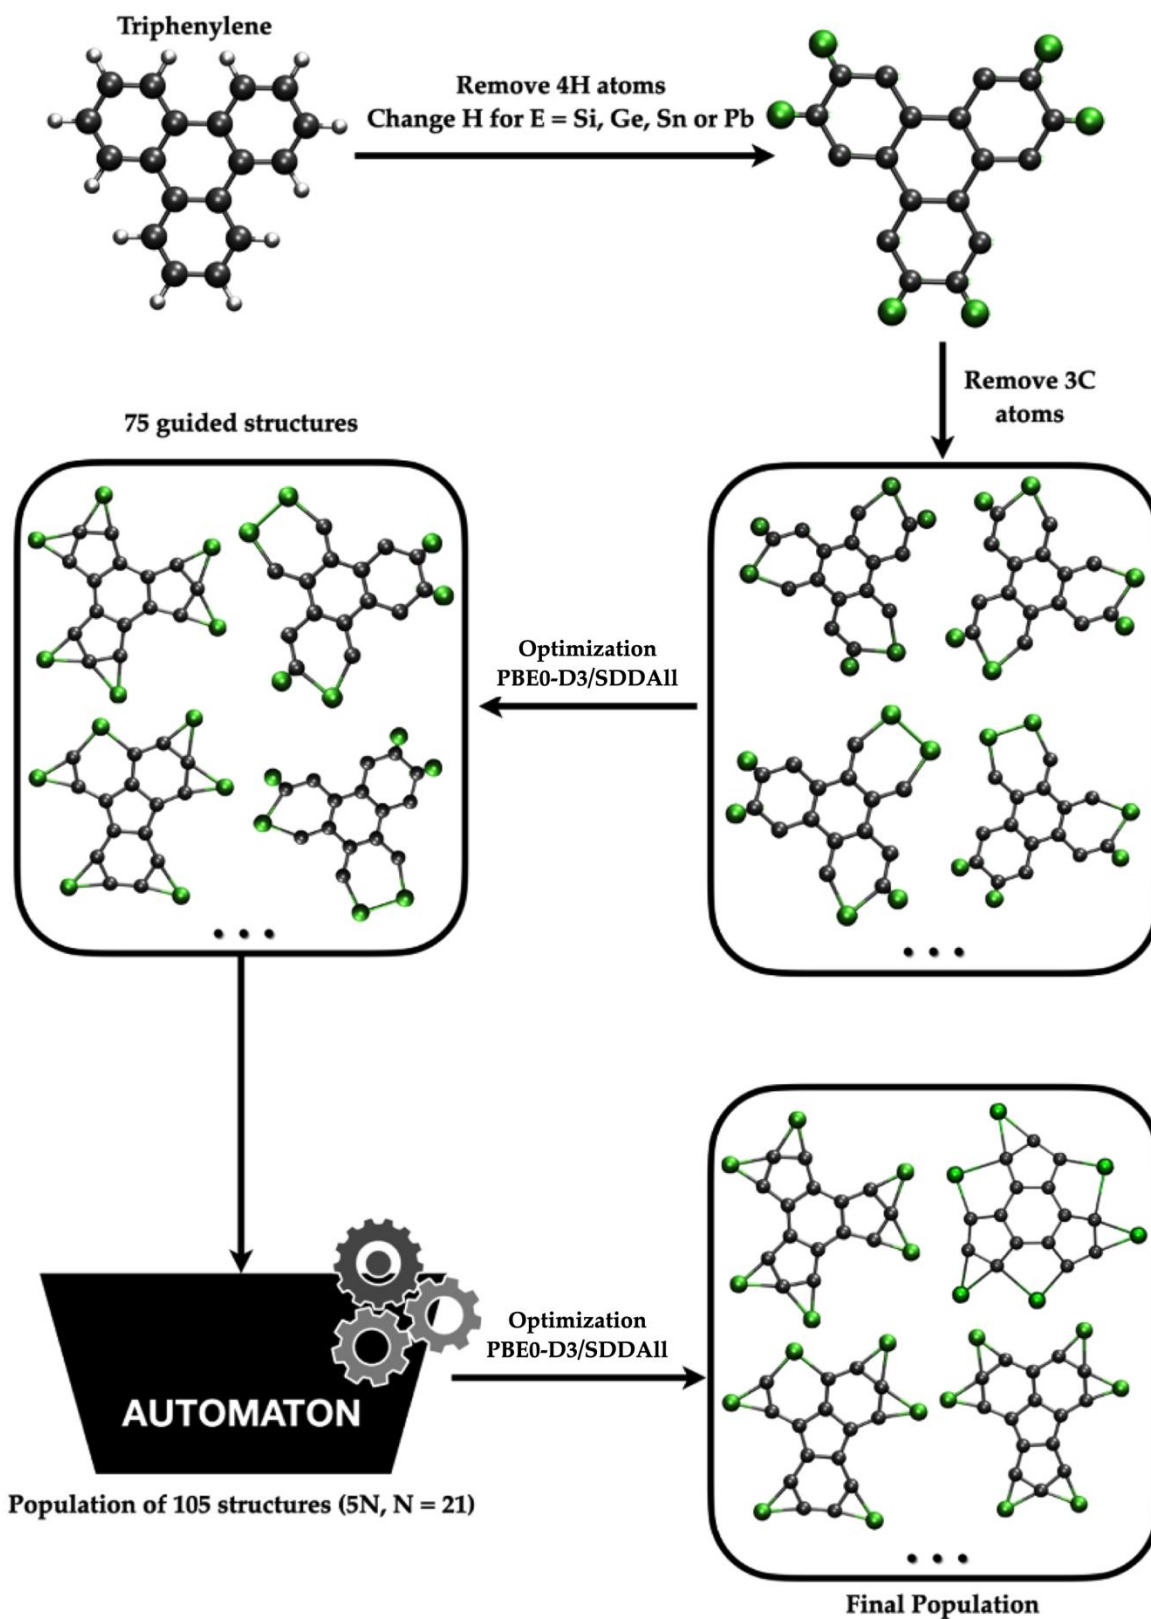

## Figures

**Figure S1.** Putative global minimum and low-lying isomers of  $\text{Si}_6\text{C}_{15}$  with their point group symmetries. Relative energies are shown in  $\text{kcal}\cdot\text{mol}^{-1}$  at  $\text{PBE0}^8\text{-D3}^9/\text{def2-TZVP}^{10}$  level, including zero-point energy (ZPE) corrections.

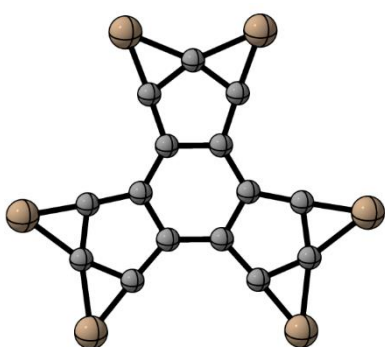

**3(Si).  $D_{3h}, {}^1A'_1$**   
**0.0**

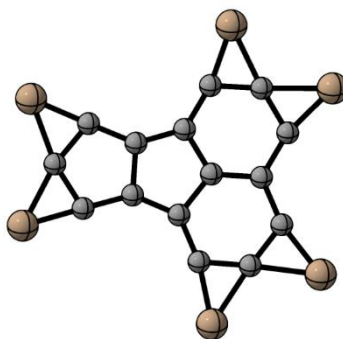

**$C_{2v}, {}^1A_1$**   
**8.2**

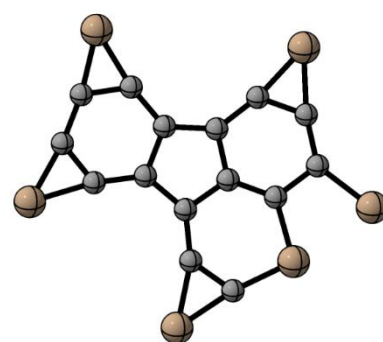

**$C_s, {}^1A'$**   
**16.8**

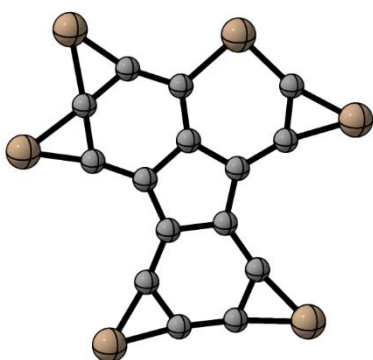

**$C_s, {}^1A'$**   
**19.4**

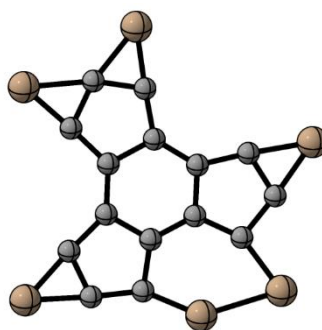

**$C_s, {}^1A'$**   
**23.0**

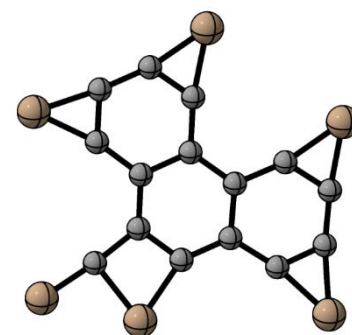

**$C_s, {}^1A'$**   
**25.6**

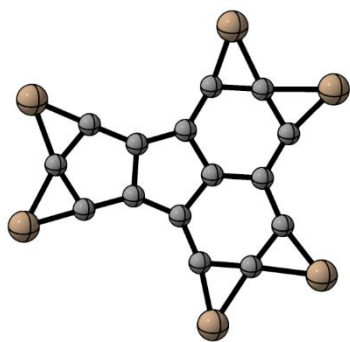

$C_{2v}, ^3A_1$   
25.9

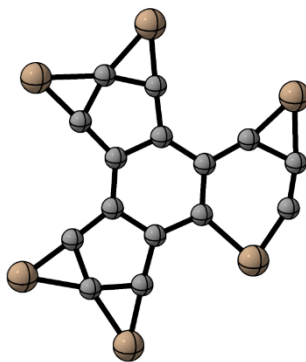

$C_s, ^1A'$   
26.2

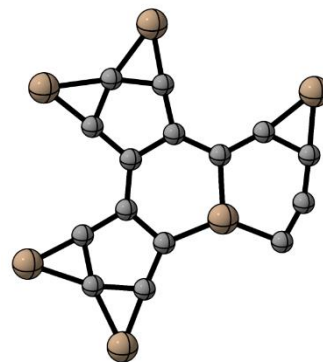

$C_s, ^1A'$   
28.7

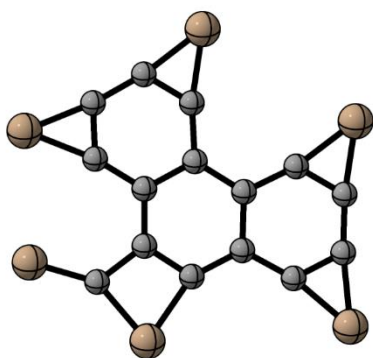

$C_s, ^1A'$   
29.2

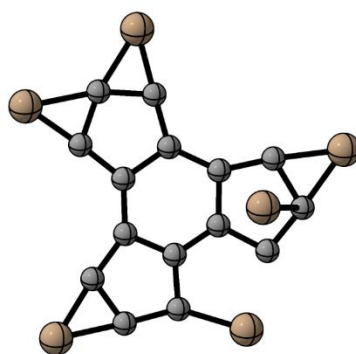

$C_1, ^1A$   
30.1

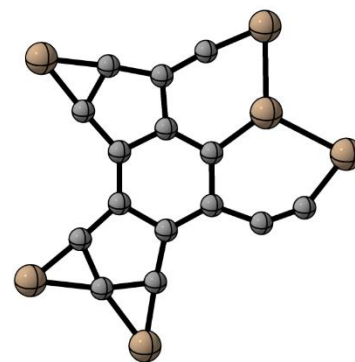

$C_s, ^1A'$   
31.7

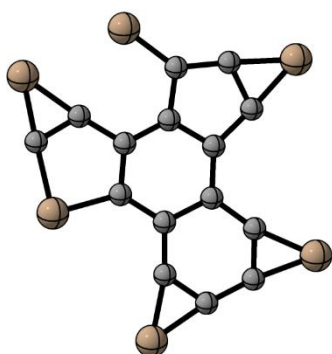

$C_s, ^1A'$   
33.1

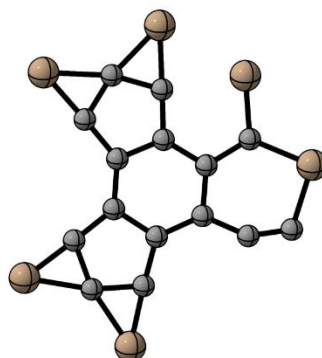

$C_s, ^1A'$   
33.5

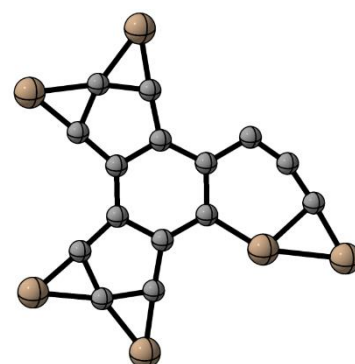

$C_s, ^1A'$   
34.2

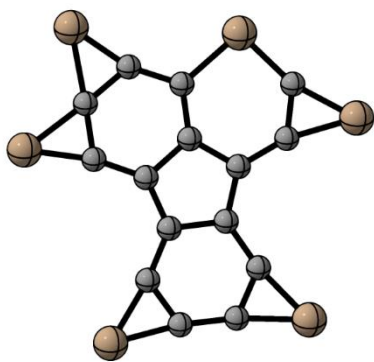

$C_s, {}^3A'$   
**34.7**

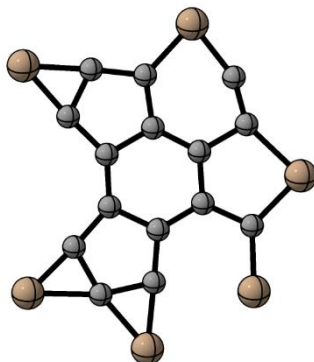

$C_s, {}^1A'$   
**34.9**

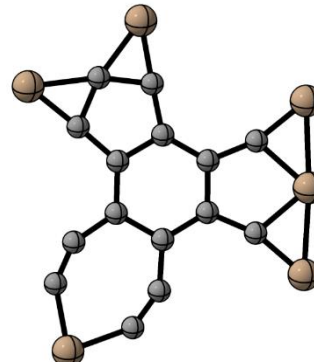

$C_s, {}^1A'$   
**35.0**

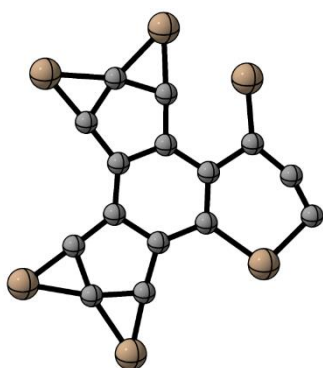

$C_s, {}^1A'$   
**37.5**

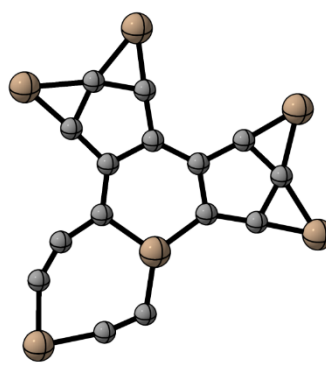

$C_s, {}^1A'$   
**41.3**

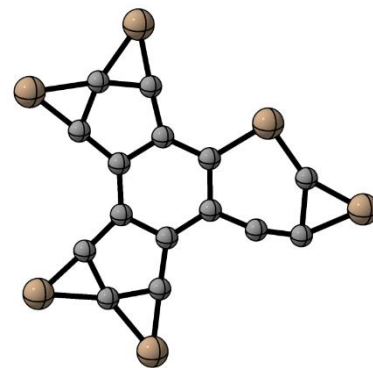

$C_s, {}^1A'$   
**42.3**

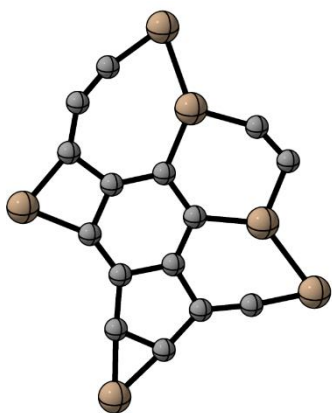

$C_s, {}^1A'$   
**42.5**

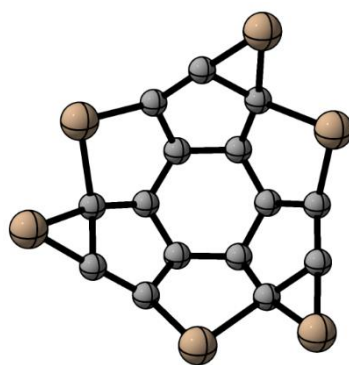

**4(Si).**  $C_3, {}^1A$   
**43.5**

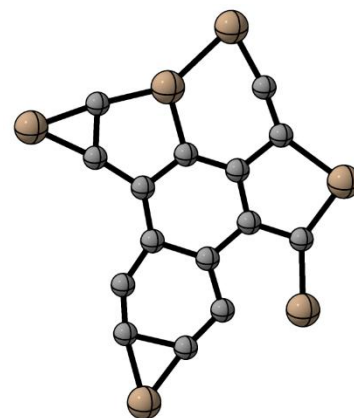

$C_s, {}^1A'$   
**44.1**



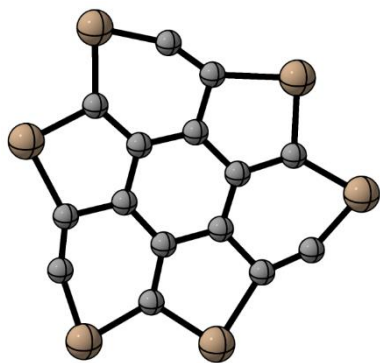

$C_{3h}, ^1A'$

**44.4**

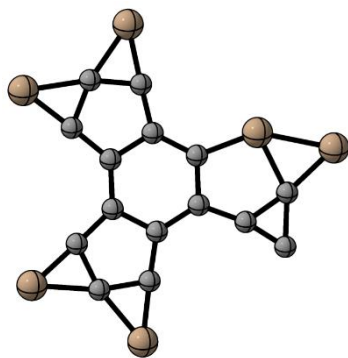

$C_s, ^1A'$

**45.2**

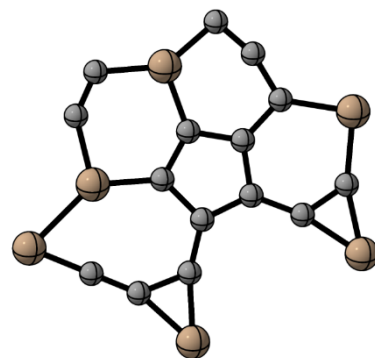

$C_s, ^1A'$

**46.2**

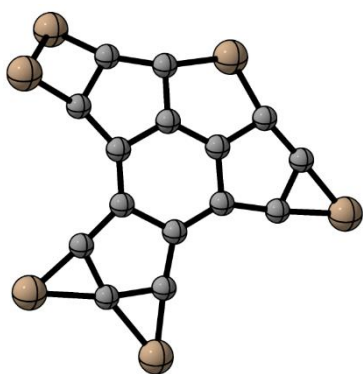

$C_s, ^1A'$

**47.3**

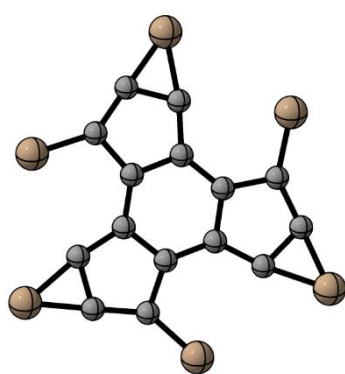

$C_{3h}, ^1A'$

**50.6**

**Figure S2.** Putative global minimum and low-lying isomers of  $\text{Ge}_6\text{C}_{15}$  with their point group symmetries. Relative energies are shown in  $\text{kcal}\cdot\text{mol}^{-1}$  at PBE0<sup>8</sup>-D3<sup>9</sup>/def2-TZVP<sup>10</sup> level including zero-point energy (ZPE) corrections.

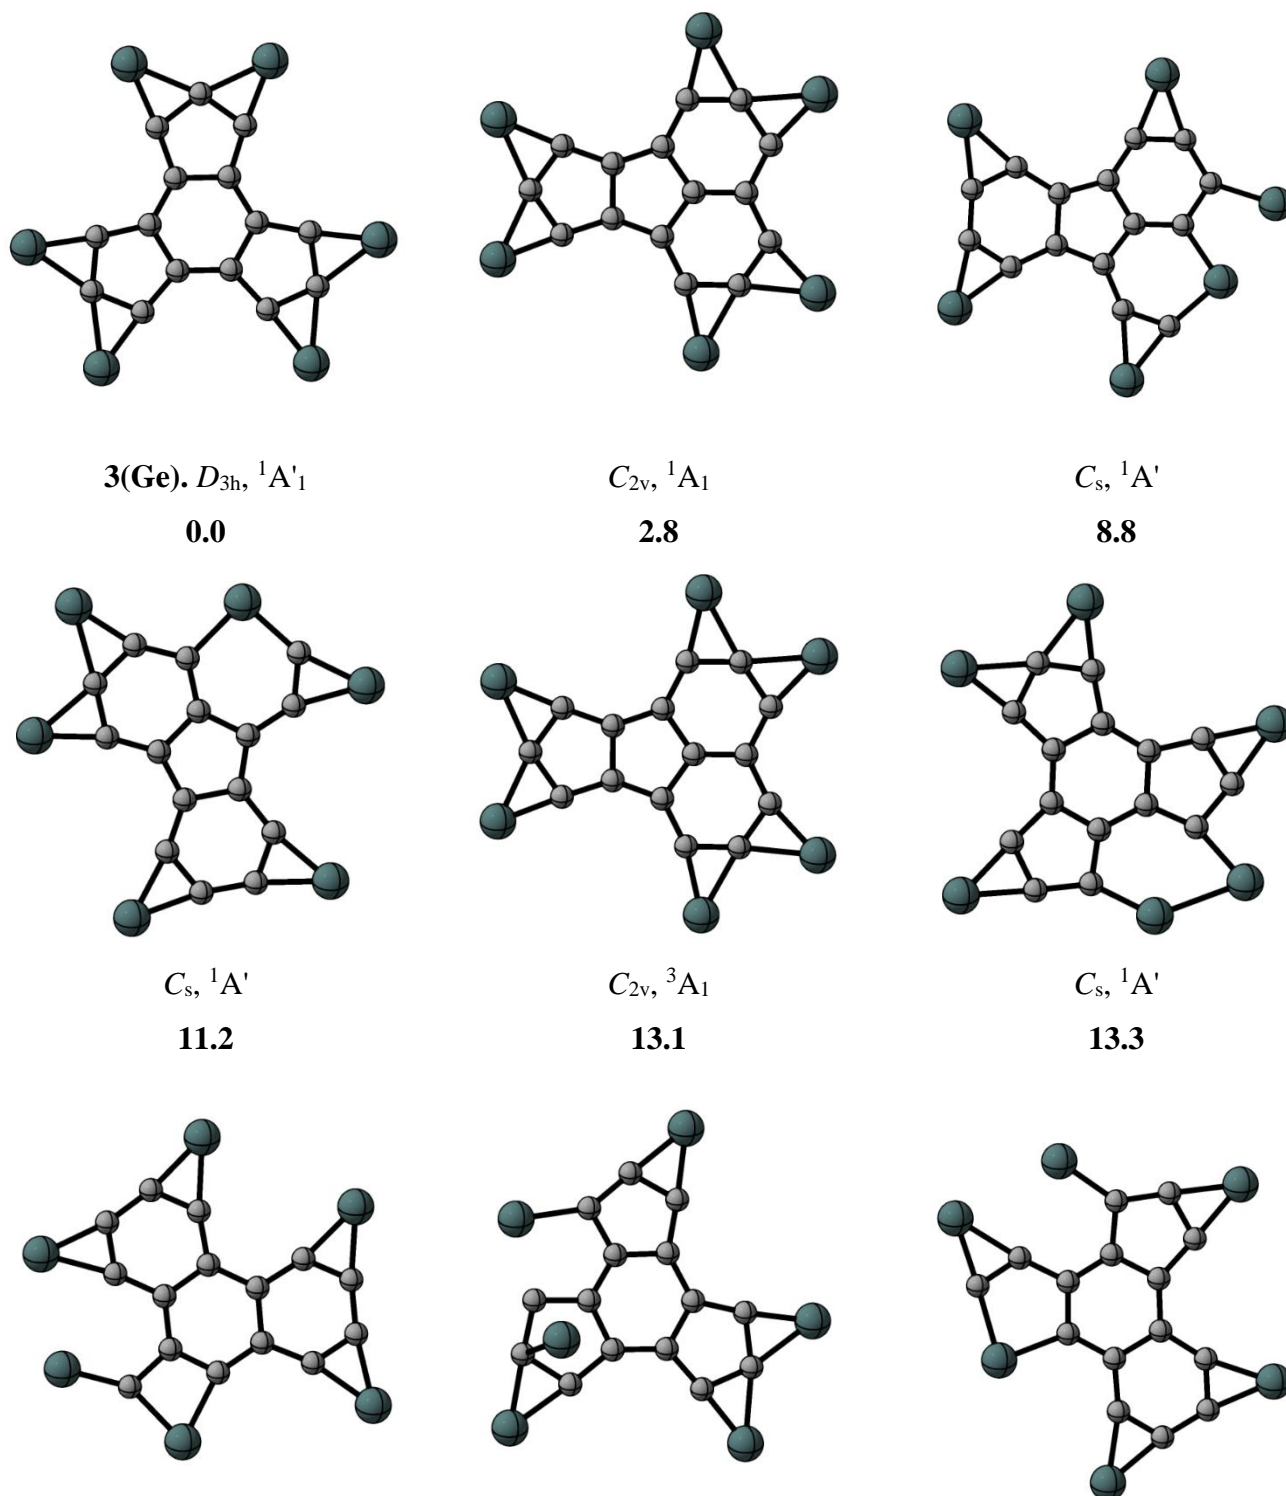

$C_s, ^1A'$

15.6

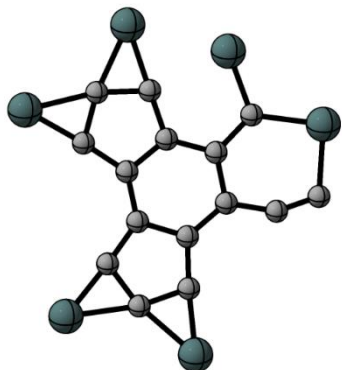

$C_s, ^1A'$

20.4

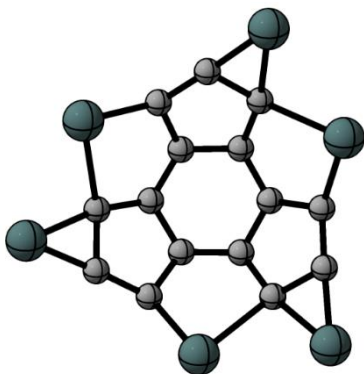

4(Ge).  $C_3, ^1A$

23.0

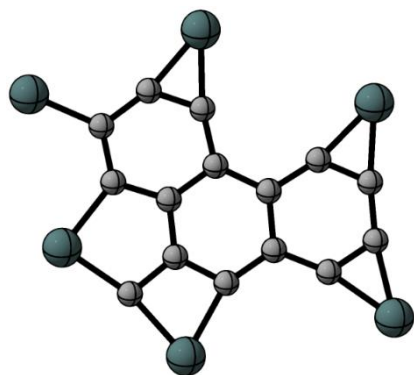

$C_s, ^3A'$

24.5

$C_1, ^1A$

15.8

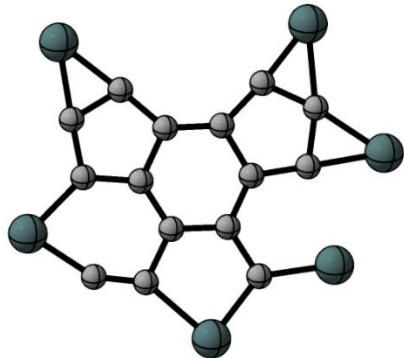

$C_s, ^1A'$

20.4

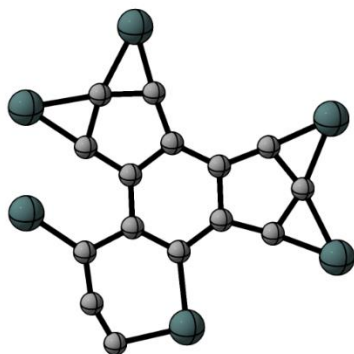

$C_s, ^1A'$

23.4

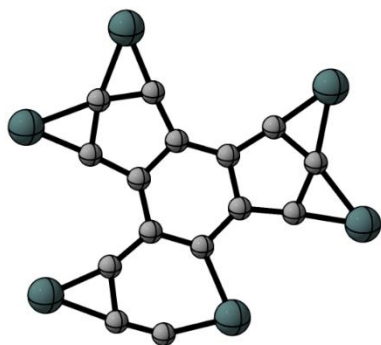

$C_s, ^1A'$

27.3

$C_s, ^1A'$

16.6

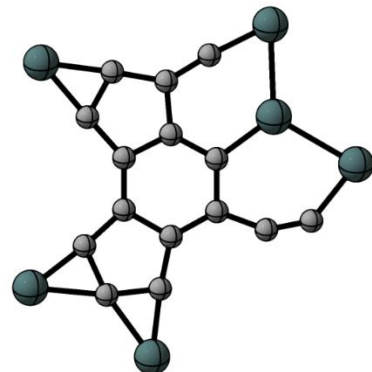

$C_s, ^1A'$

22.2

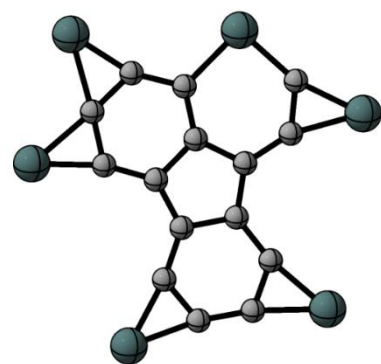

$C_s, ^3A'$

23.9

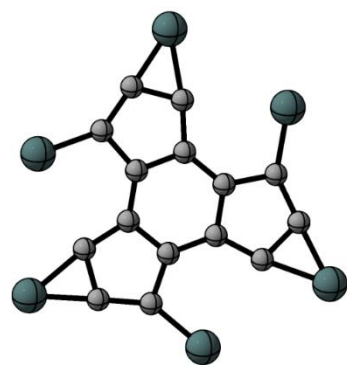

$C_{3h}, ^1A'$

27.8

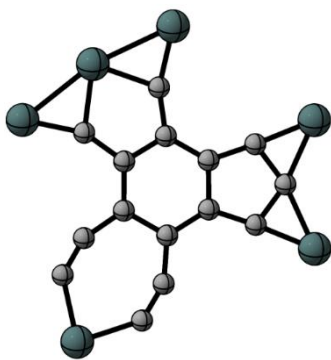

$C_s, ^1A'$

**27.9**

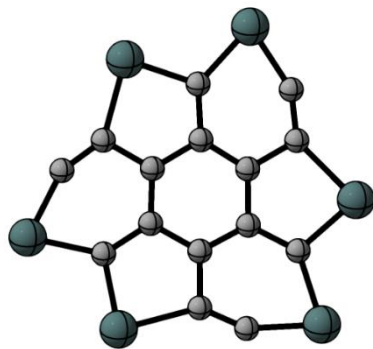

$C_{3h}, ^1A'$

**28.7**

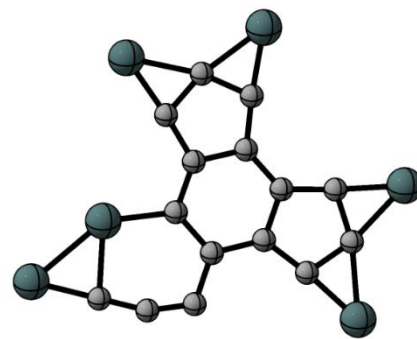

$C_s, ^1A'$

**29.7**

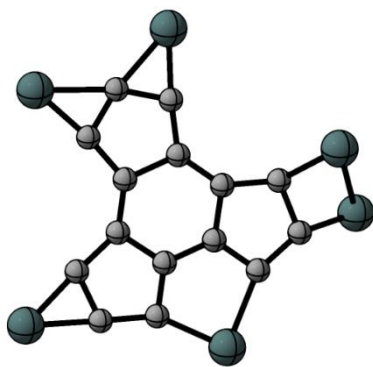

$C_1, ^1A$

**31.5**

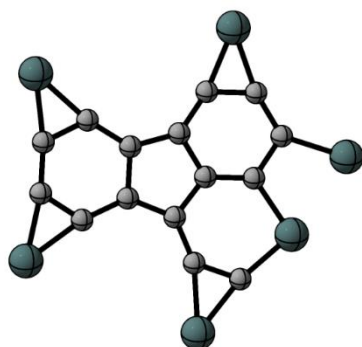

$C_s, ^3A'$

**32.5**

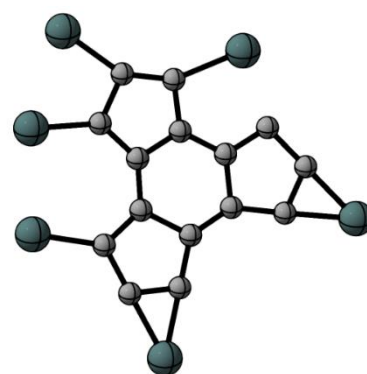

$C_1, ^1A$

**34.3**

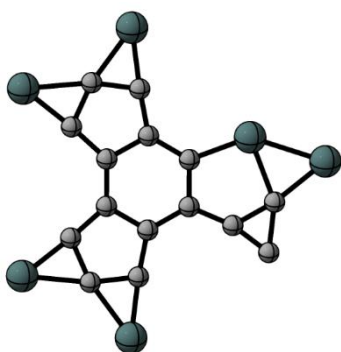

$C_s, ^1A'$

**39.3**

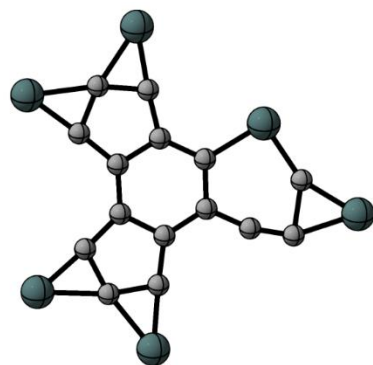

$C_s, ^1A'$

**42.0**

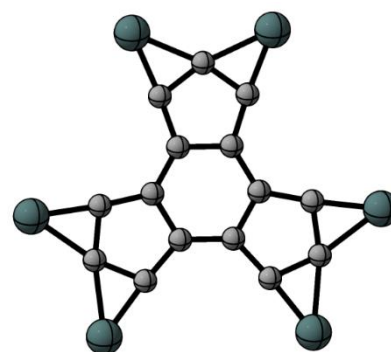

$D_{3h}, ^3A_1$

**46.9**

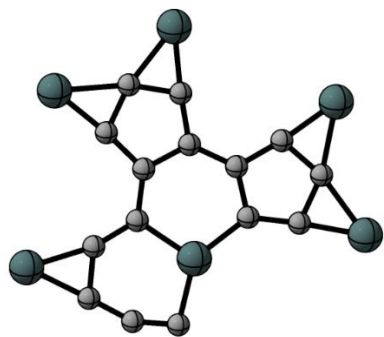

$C_s, {}^1A'$   
**47.7**

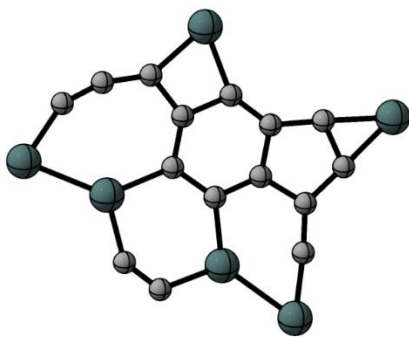

$C_1, {}^1A$   
**49.7**

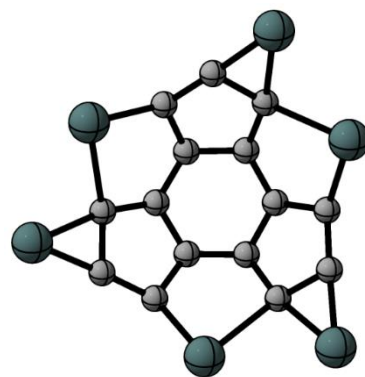

$C_3, {}^3A$   
**50.0**

**Figure S3.** Putative global minimum and low-lying isomers of  $\text{Sn}_6\text{C}_{15}$  with their point group symmetries. Relative energies are shown in  $\text{kcal}\cdot\text{mol}^{-1}$  at  $\text{PBE0}^8\text{-D3}^9/\text{def2-TZVP}^{10}$  level including zero-point energy (ZPE) corrections.

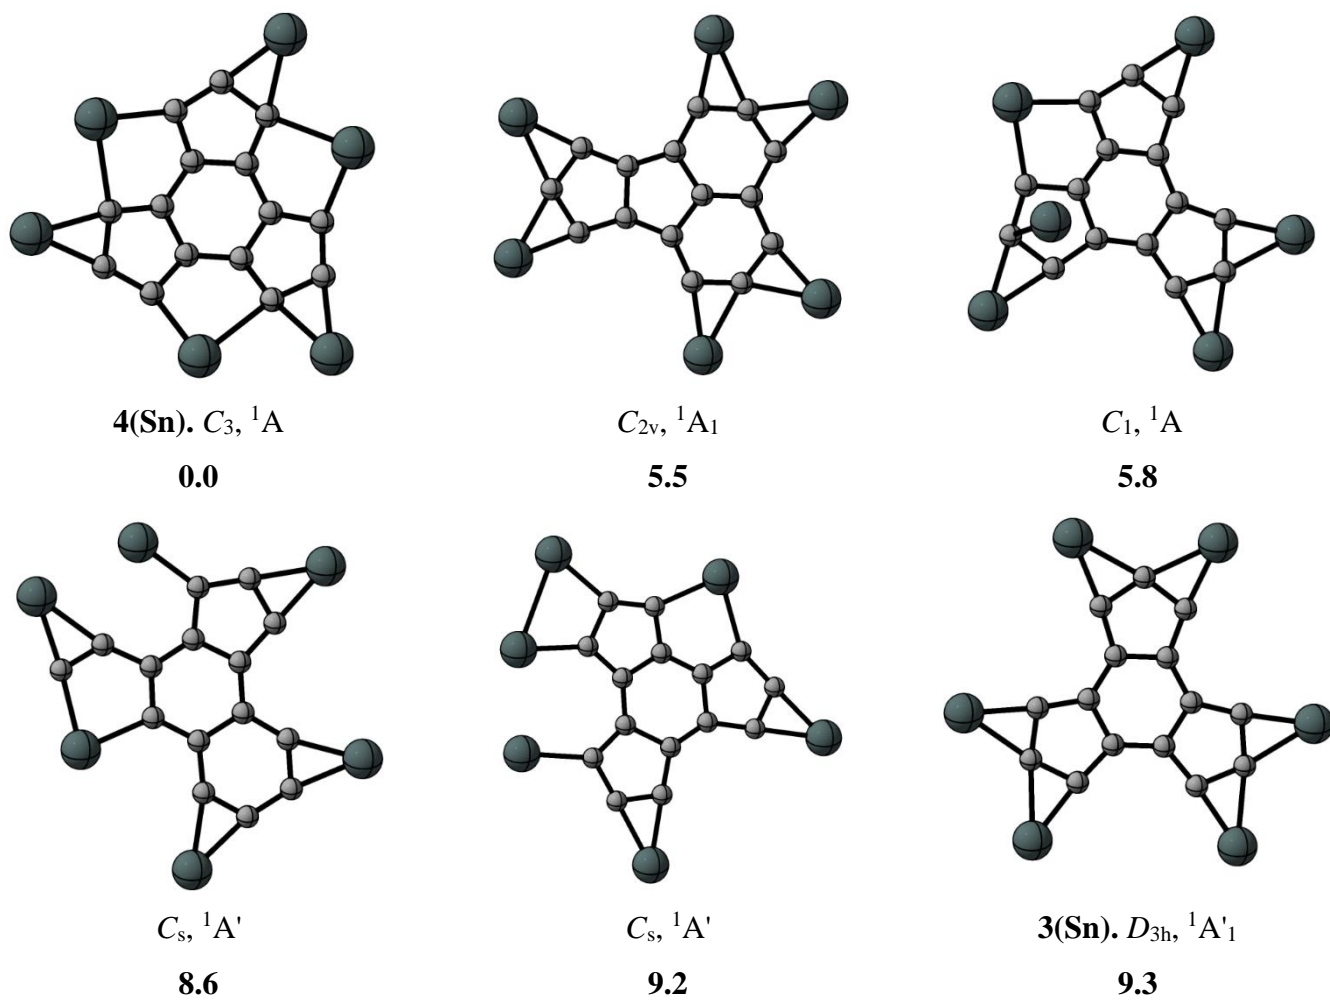

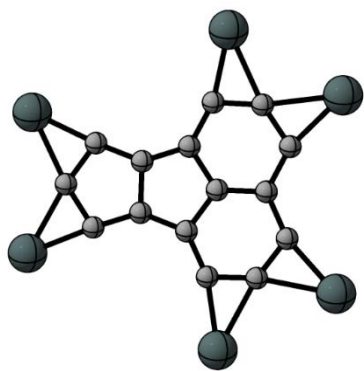

$C_{2v}, {}^3A_1$

**9.5**

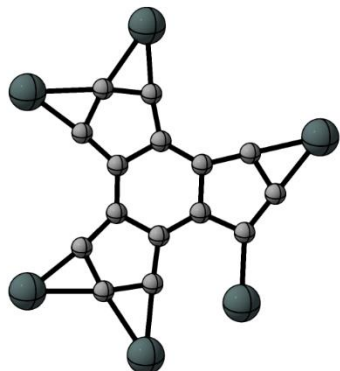

$C_s, {}^1A'$

**10.1**

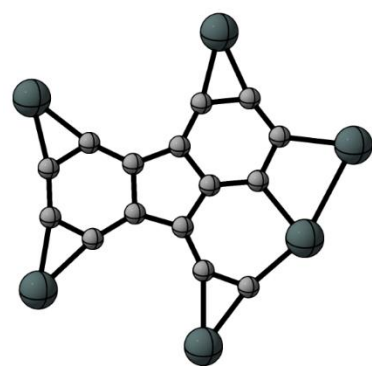

$C_s, {}^1A'$

**10.2**

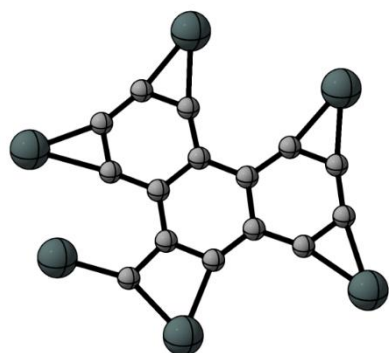

$C_s, {}^1A'$

**11.2**

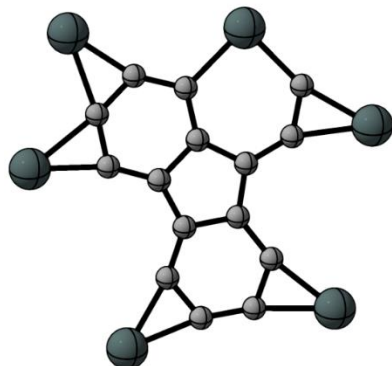

$C_s, {}^1A'$

**11.8**

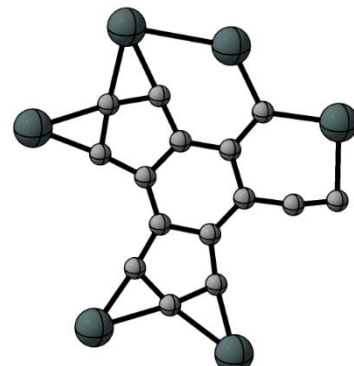

$C_s, {}^1A'$

**12.2**

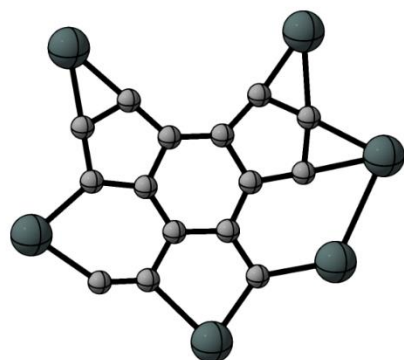

$C_s, {}^1A'$

**12.3**

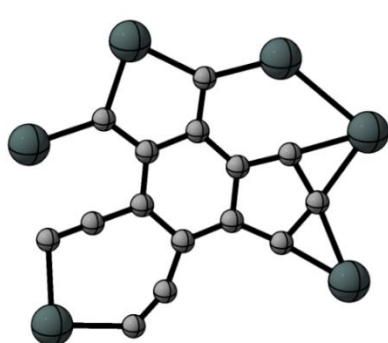

$C_s, {}^1A'$

**12.8**

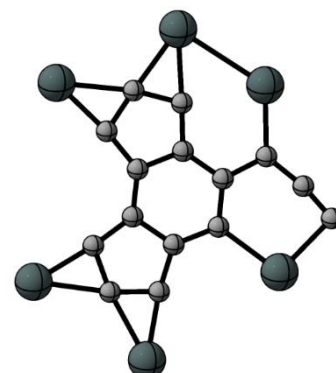

$C_s, {}^1A'$

**13.7**

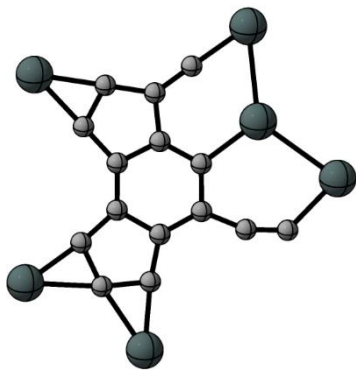

$C_s, {}^1A'$   
**19.7**

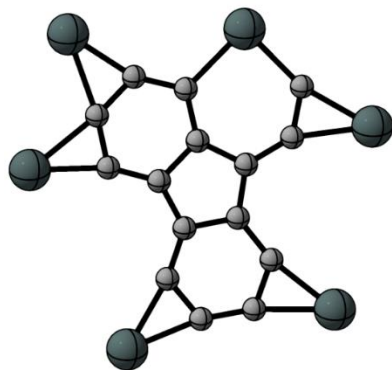

$C_s, {}^3A'$   
**20.5**

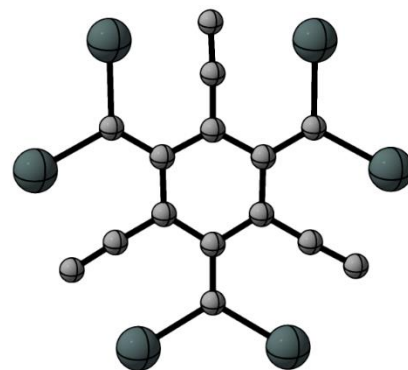

$D_{3h}, {}^1A_1$   
**20.6**

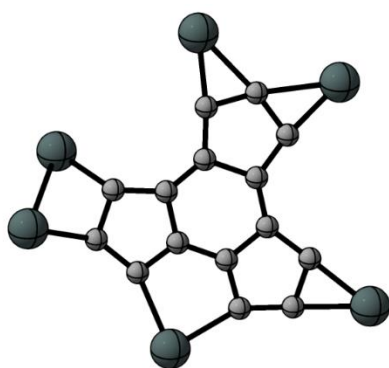

$C_1, {}^1A$   
**20.8**

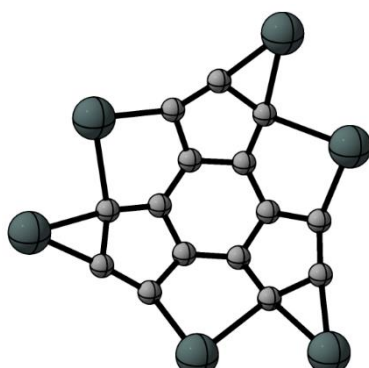

$C_3, {}^3A$   
**24.0**

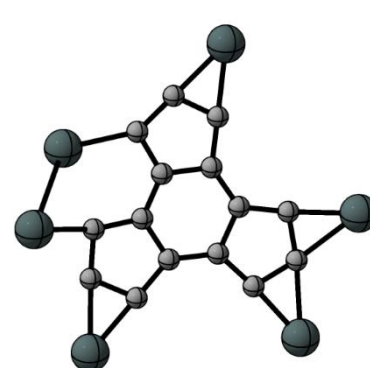

$C_1, {}^3A$   
**26.3**

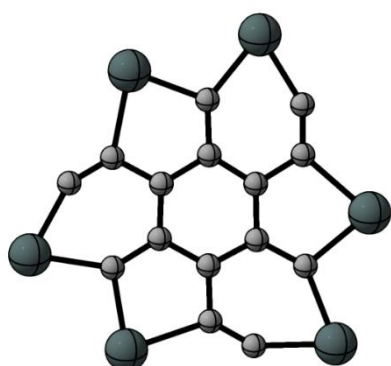

$C_{3h}, {}^1A'$   
**27.6**

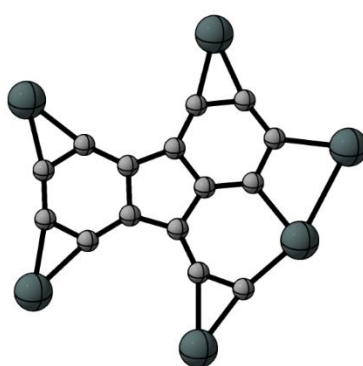

$C_s, {}^3A'$   
**29.0**

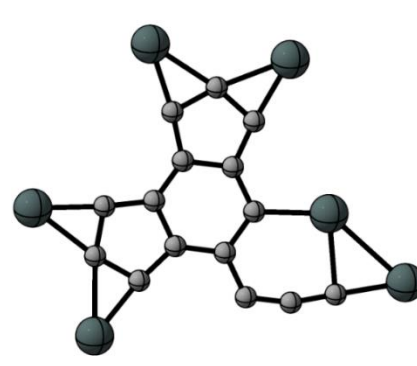

$C_s, {}^1A'$   
**32.9**



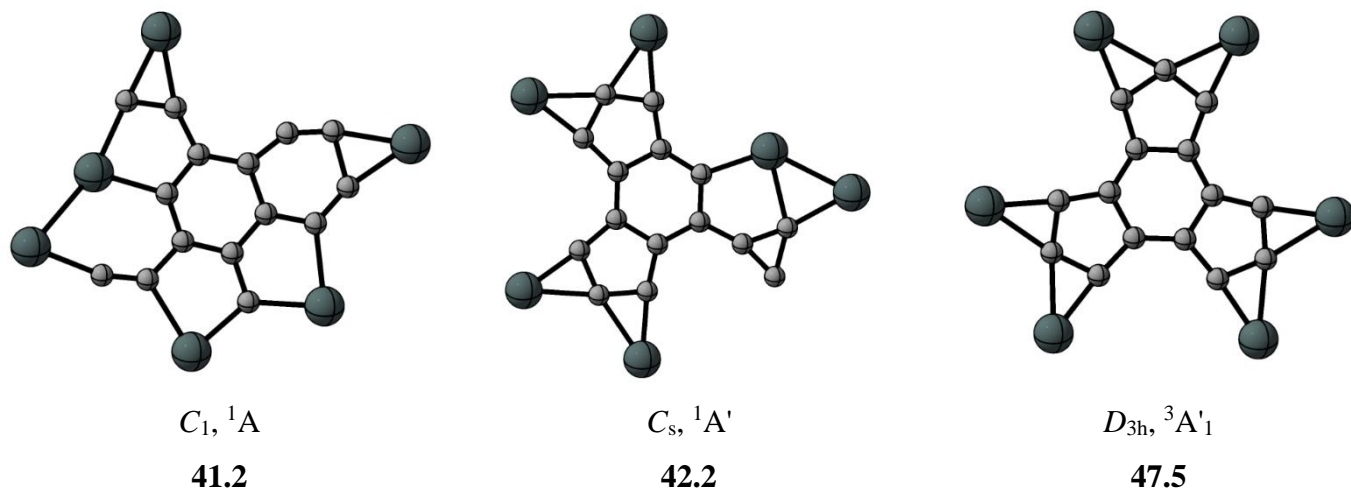

**Figure S4.** Putative global minimum and low-lying isomers of  $Pb_6C_{15}$  with their point group symmetries. Relative energies are shown in  $\text{kcal}\cdot\text{mol}^{-1}$  at PBE0<sup>8</sup>-D3<sup>9</sup>/def2-TZVP<sup>10</sup> level including zero-point energy (ZPE) corrections.

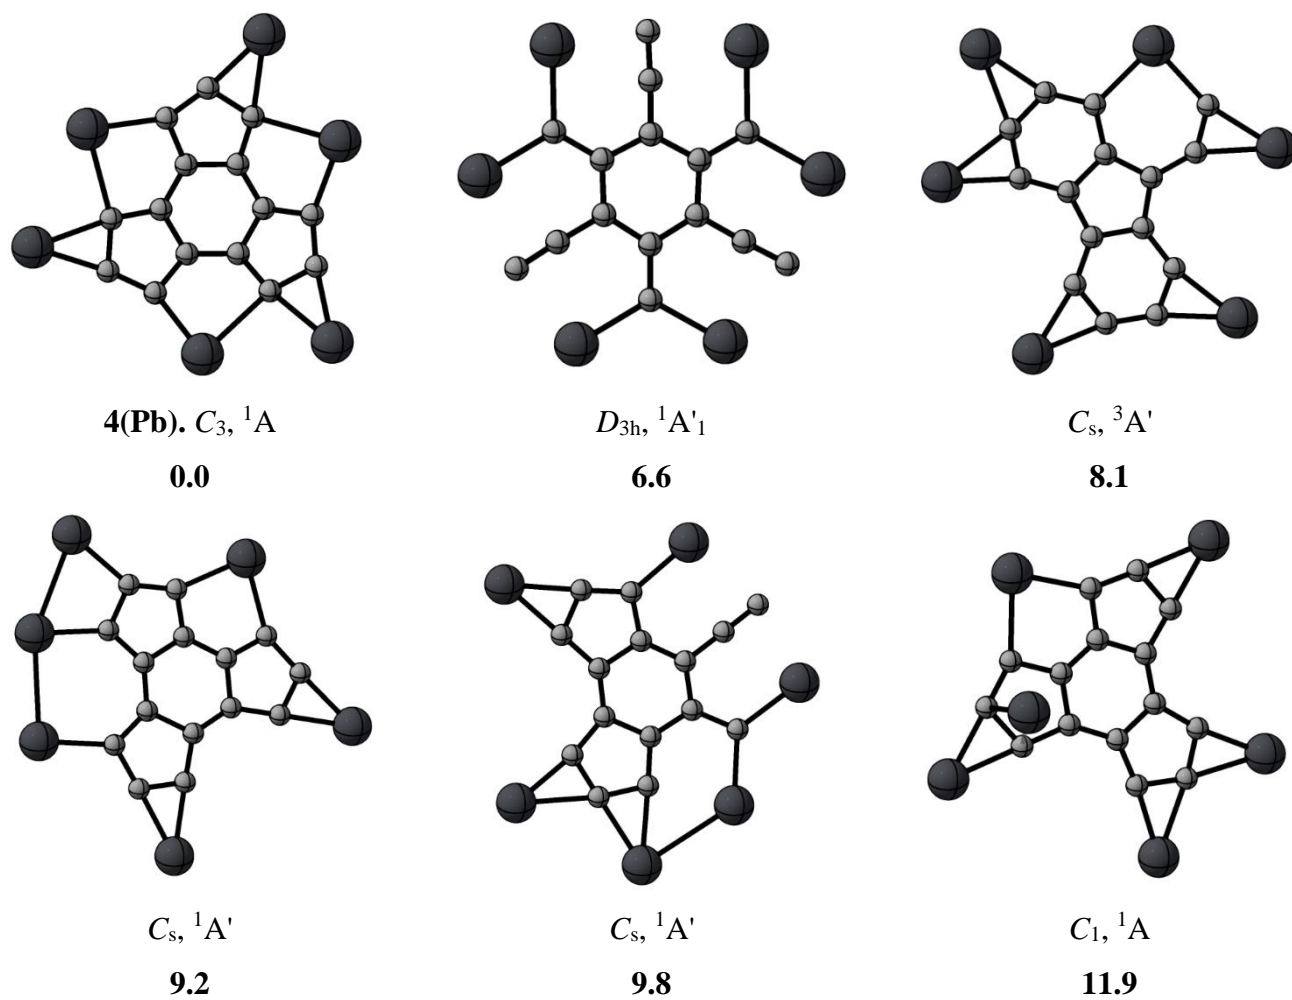

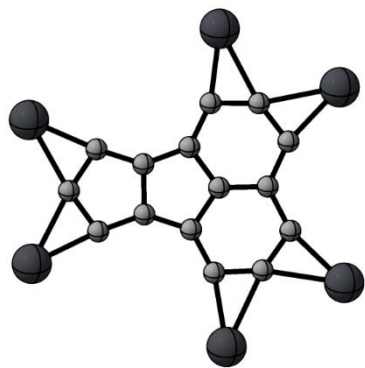

$C_{2v}, ^1A_1$   
12.2

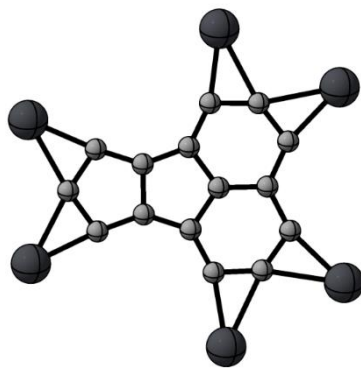

$C_{2v}, ^3A_1$   
12.2

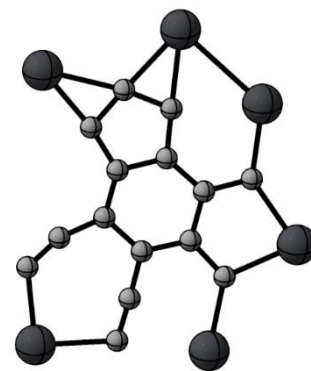

$C_s, ^1A'$   
13.6

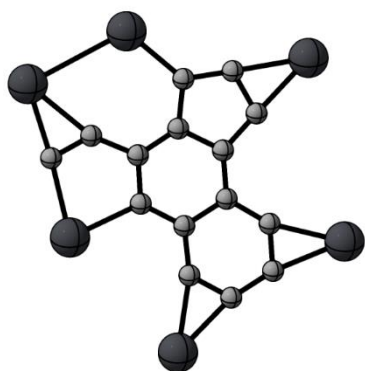

$C_s, ^1A'$   
13.9

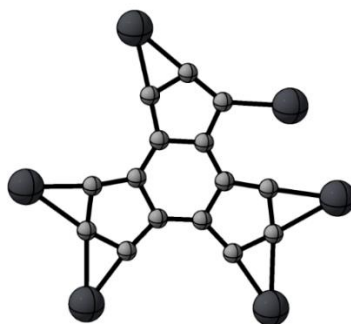

$C_s, ^1A'$   
17.5

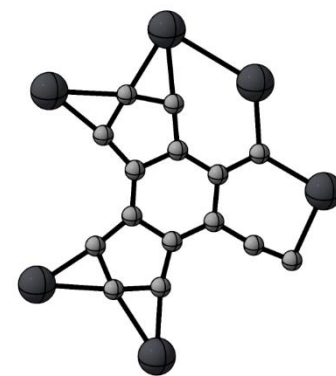

$C_s, ^1A'$   
18.2

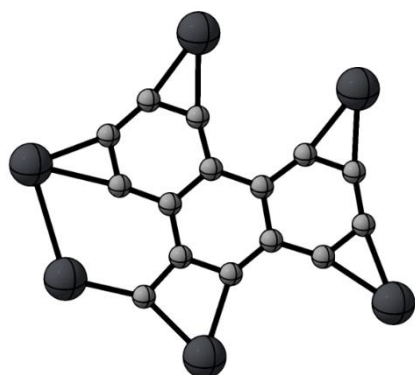

$C_s, ^1A'$   
18.5

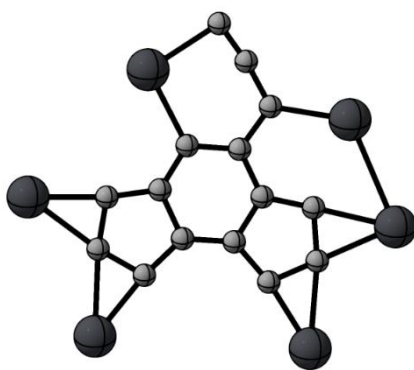

$C_s, ^1A'$   
18.8

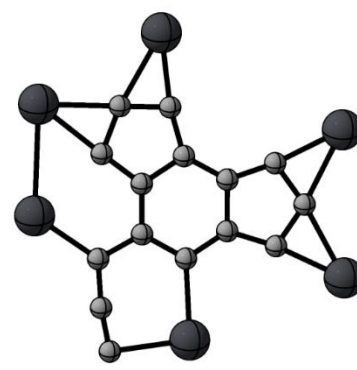

$C_s, ^1A'$   
18.8

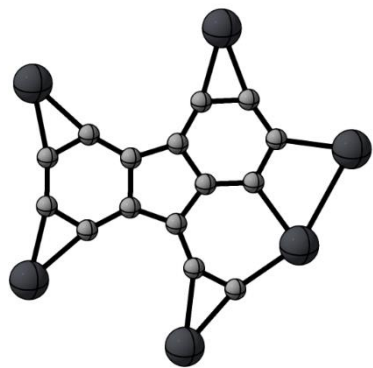

$C_s, {}^1A'$   
19.7

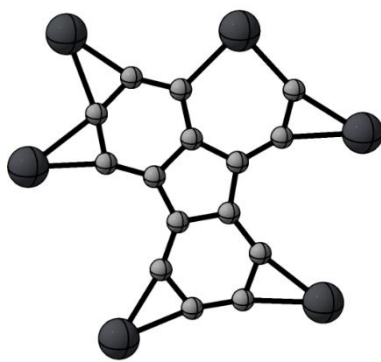

$C_s, {}^1A'$   
19.9

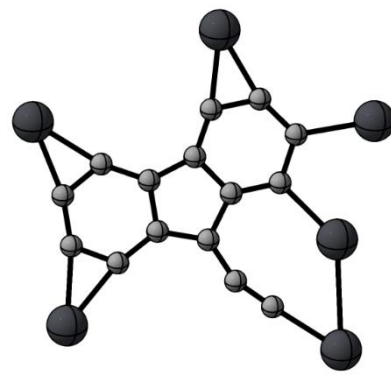

$C_s, {}^3A'$   
20.7

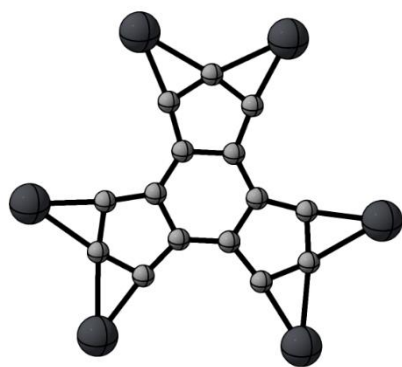

**3(Pb).**  $D_{3h}, {}^1A_1$   
21.5

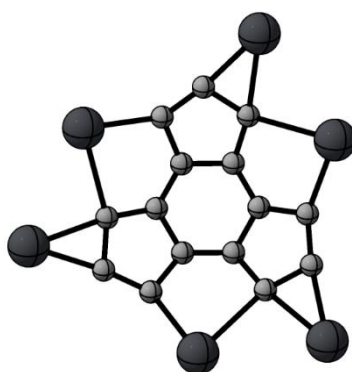

$C_3, {}^3A$   
22.8

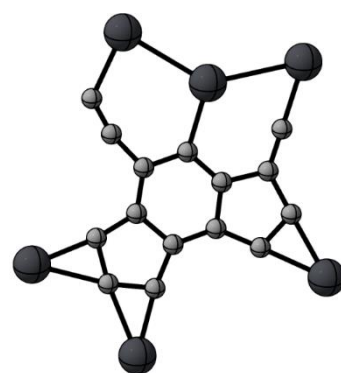

$C_s, {}^1A'$   
29.3

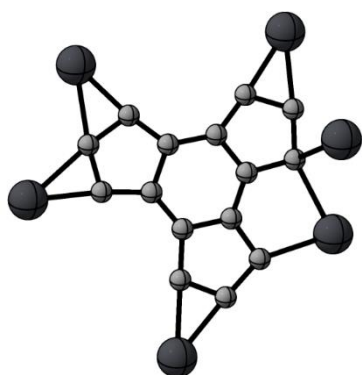

$C_1, {}^3A$   
29.3

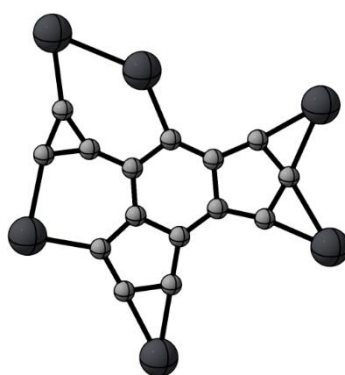

$C_s, {}^1A'$   
34.0

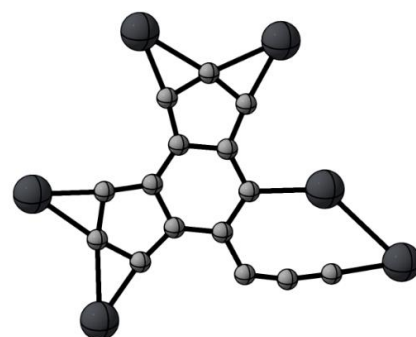

$C_s, {}^1A'$   
41.6

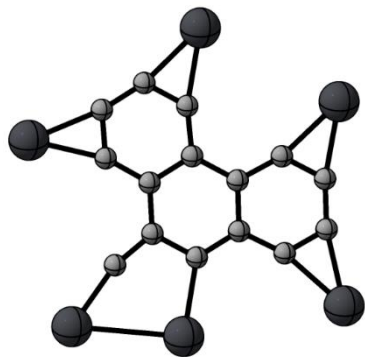

$C_s, {}^3A'$

**45.7**

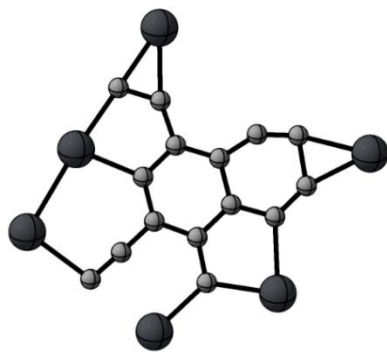

$C_s, {}^1A'$

**46.6**

**Figure S5.** The natural charges (red) for the  $\text{Si}_6\text{C}_{15}/\text{Ge}_6\text{C}_{15}$  putative global minimum at the PBE0/def2-TZVP level.

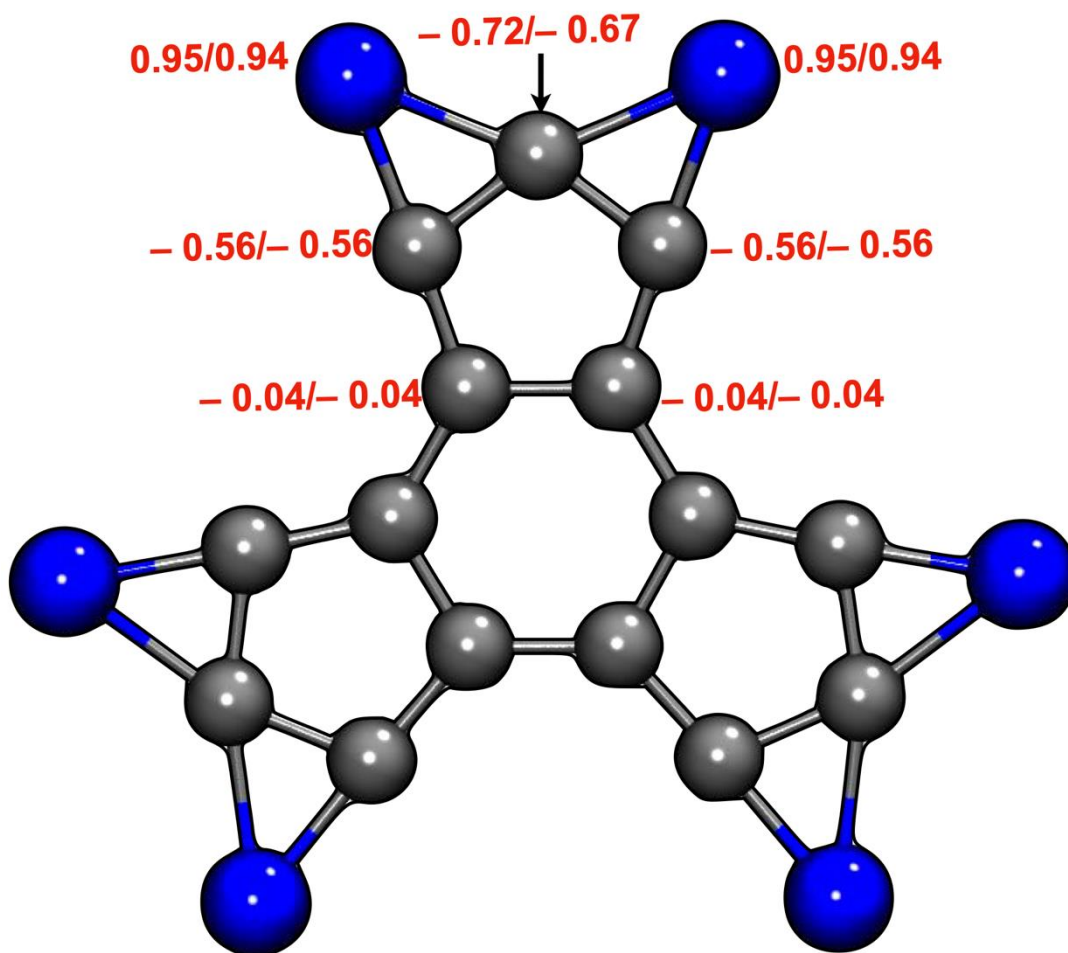

**Figure S6.** The natural charges (red) for the  $\text{Sn}_6\text{C}_{15}/\text{Pb}_6\text{C}_{15}$  putative global minimum at the PBE0/def2-TZVP level.

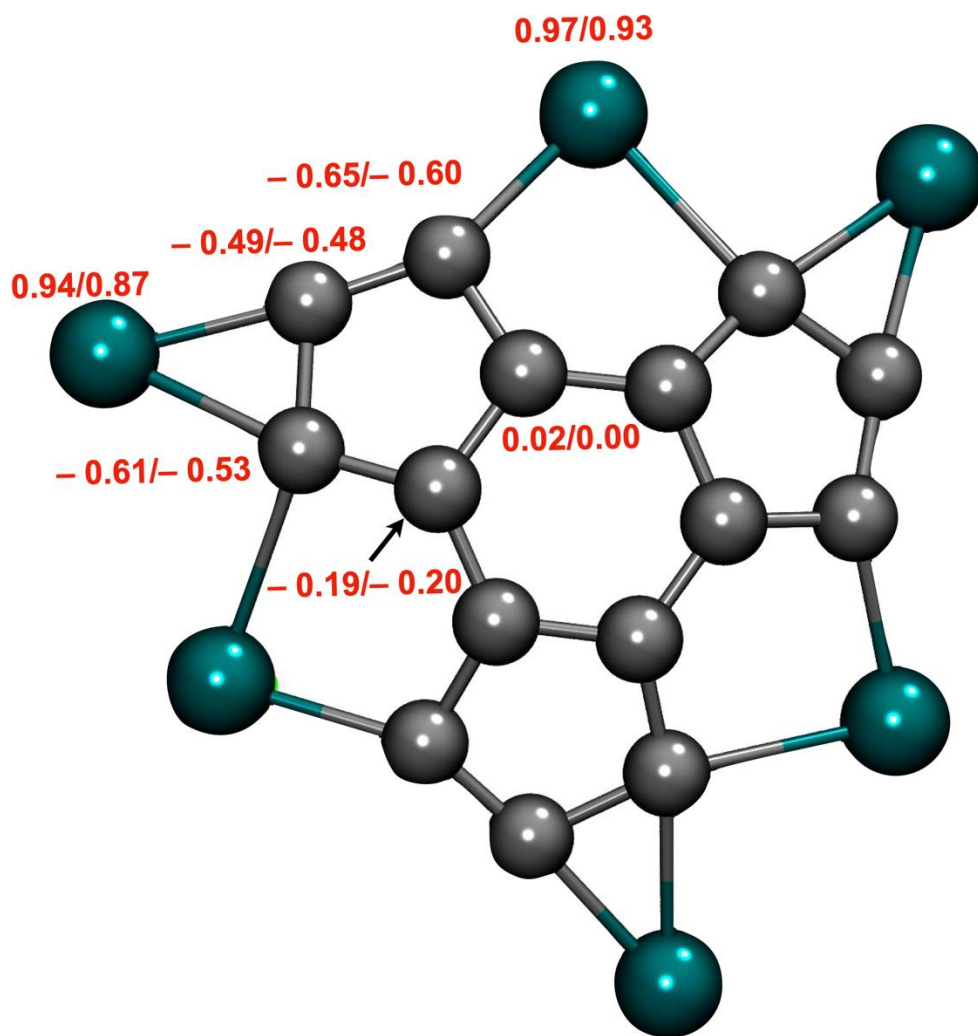

**Figure S7.** Lowest energy structures of  $E_6C_{15}$  at  $\omega$ B97XD/def2-TZVP level (relative energies in  $\text{kcal}\cdot\text{mol}^{-1}$ , including the zero-point energy (ZPE) corrections). The bond length in  $\text{\AA}$  (black) and WBI values (blue) at  $\omega$ B97XD<sup>11</sup>/def2-TZVP level.

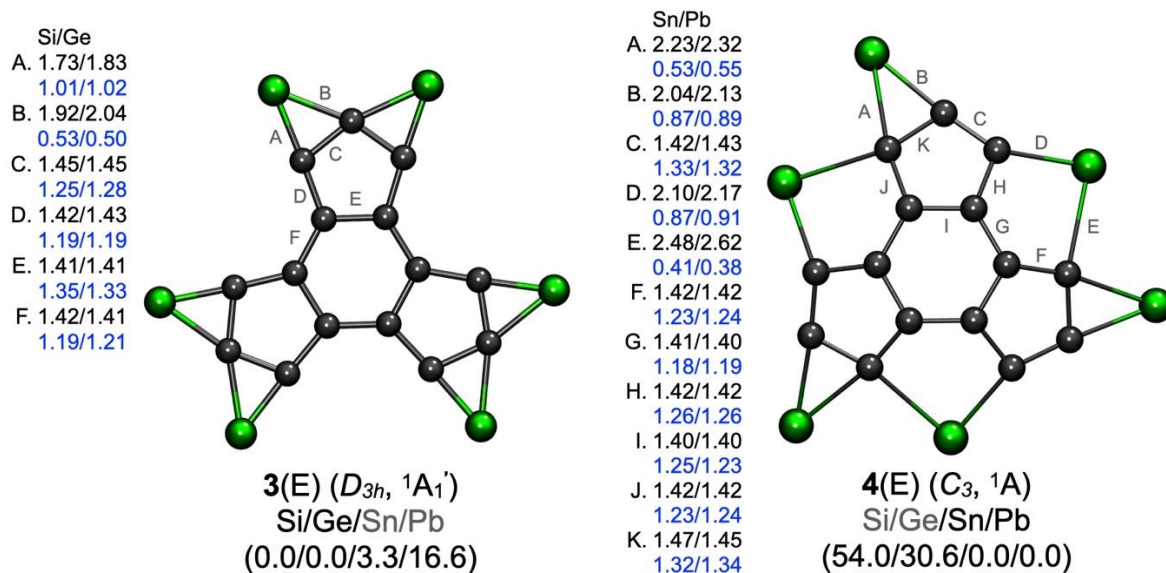

**Figure S8.** Lowest energy structures of  $E_6C_{15}$  at MP2/def2-TZVP level (relative energies in  $\text{kcal}\cdot\text{mol}^{-1}$ ). The bond length in  $\text{\AA}$  (black) and WBI values (blue) at MP2/def2-TZVP level.

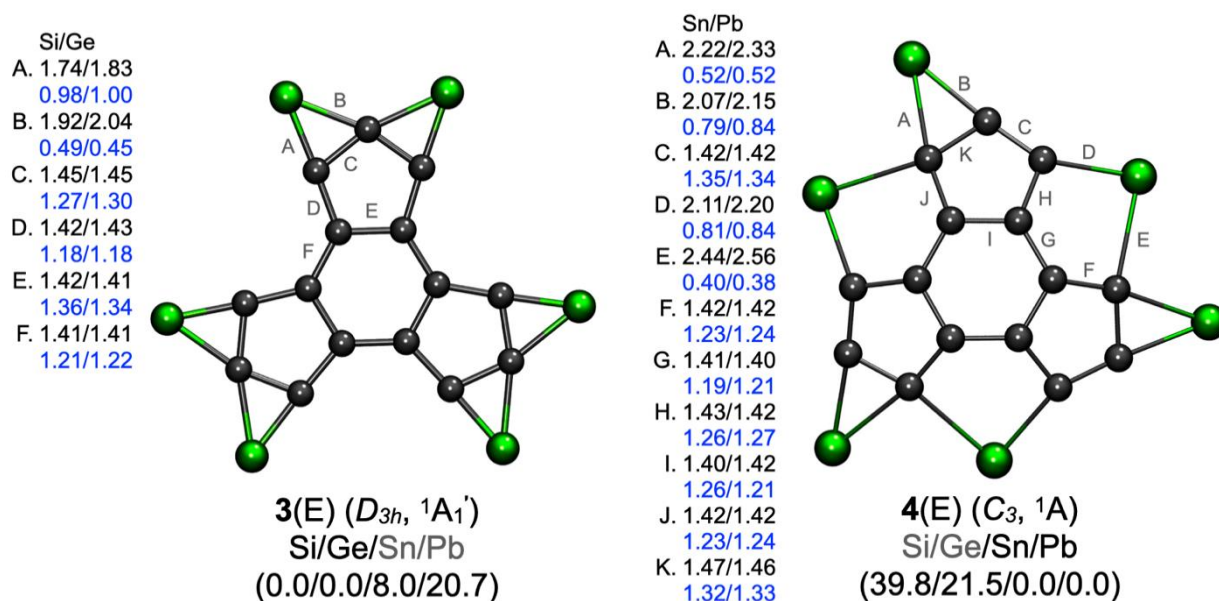

**Figure S9.** AdNDP<sup>12,13</sup> analysis of the 3(Ge) system ( $D_{3h}$ -Ge<sub>6</sub>C<sub>15</sub>). ON stands for occupation number. Carbon=gray, Germanium=brown.

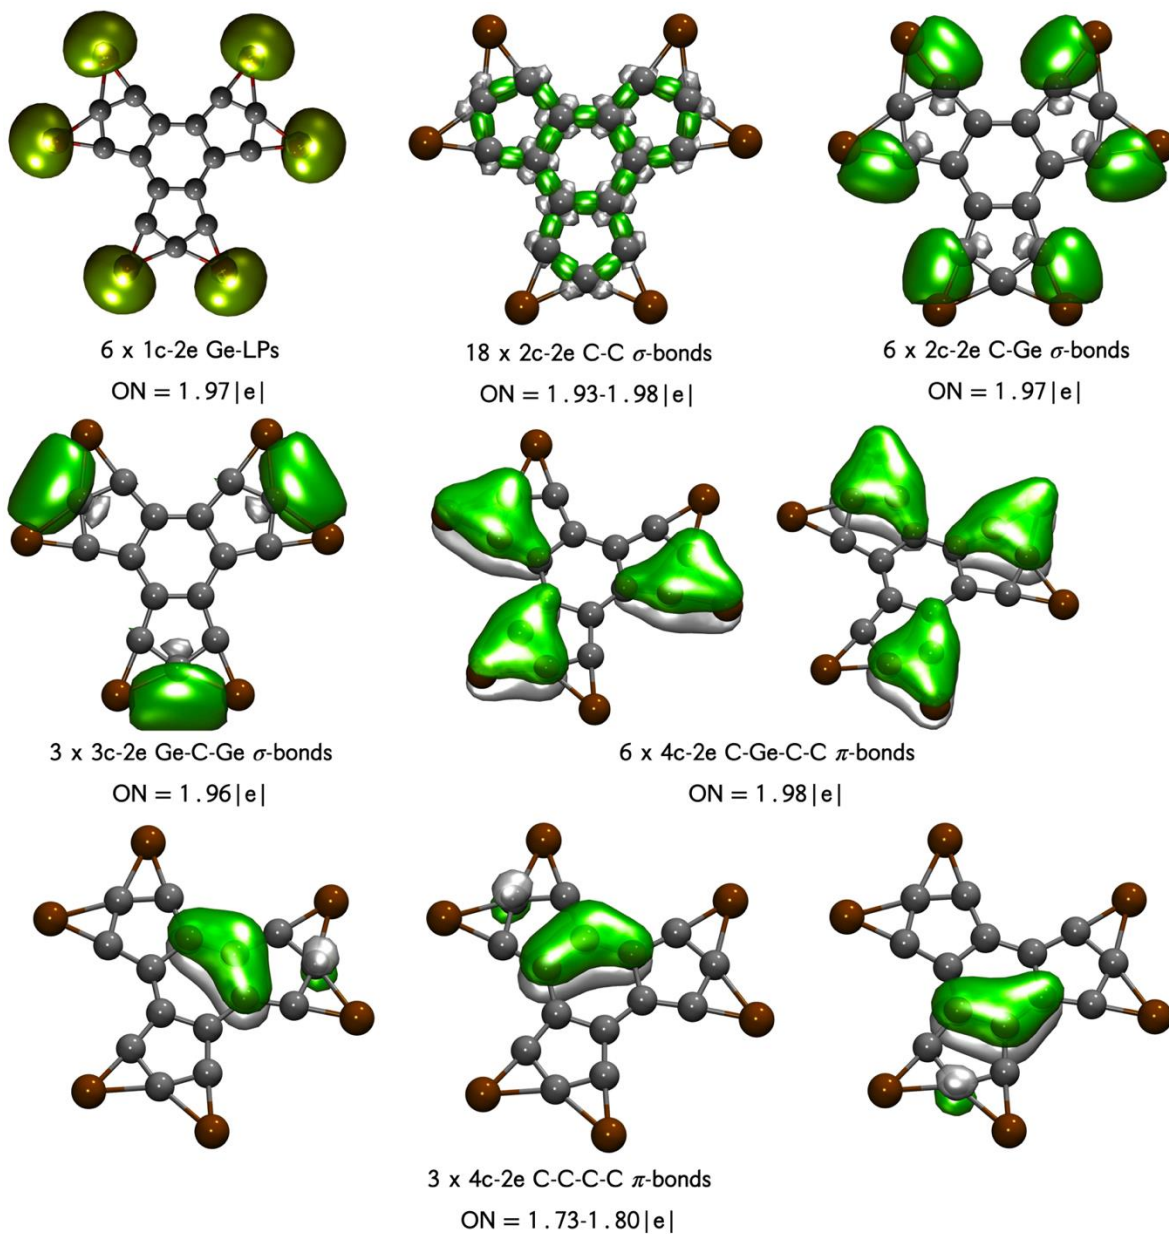



**Figure S10.** AdNDP analysis of **4(E)** systems (E=Sn, Pb). ON stands for occupation number.  
Carbon=gray, Silicon=blue.

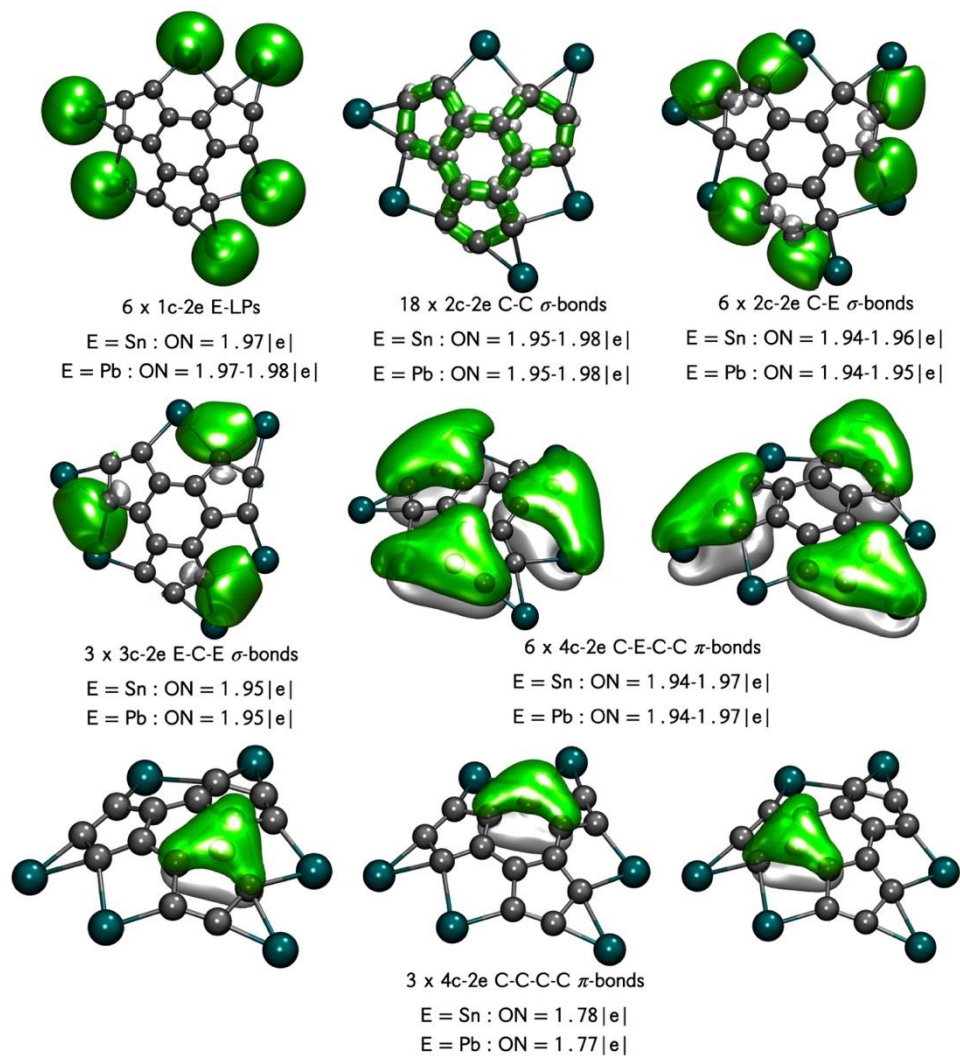

**Figure S11.** Different detected ring current circuits for the  $D_{3h}$ -Si<sub>6</sub>C<sub>15</sub> system (up) and the RCS profiles along the different integration planes (down) were used to estimate their intensity. Computations were performed using the GIMIC program,<sup>14,15</sup> which employs the gauge-including atomic orbital (GIAO)<sup>16</sup> method. To visualize current pathways, we used Paraview 5.10.0 software.<sup>17,18</sup>

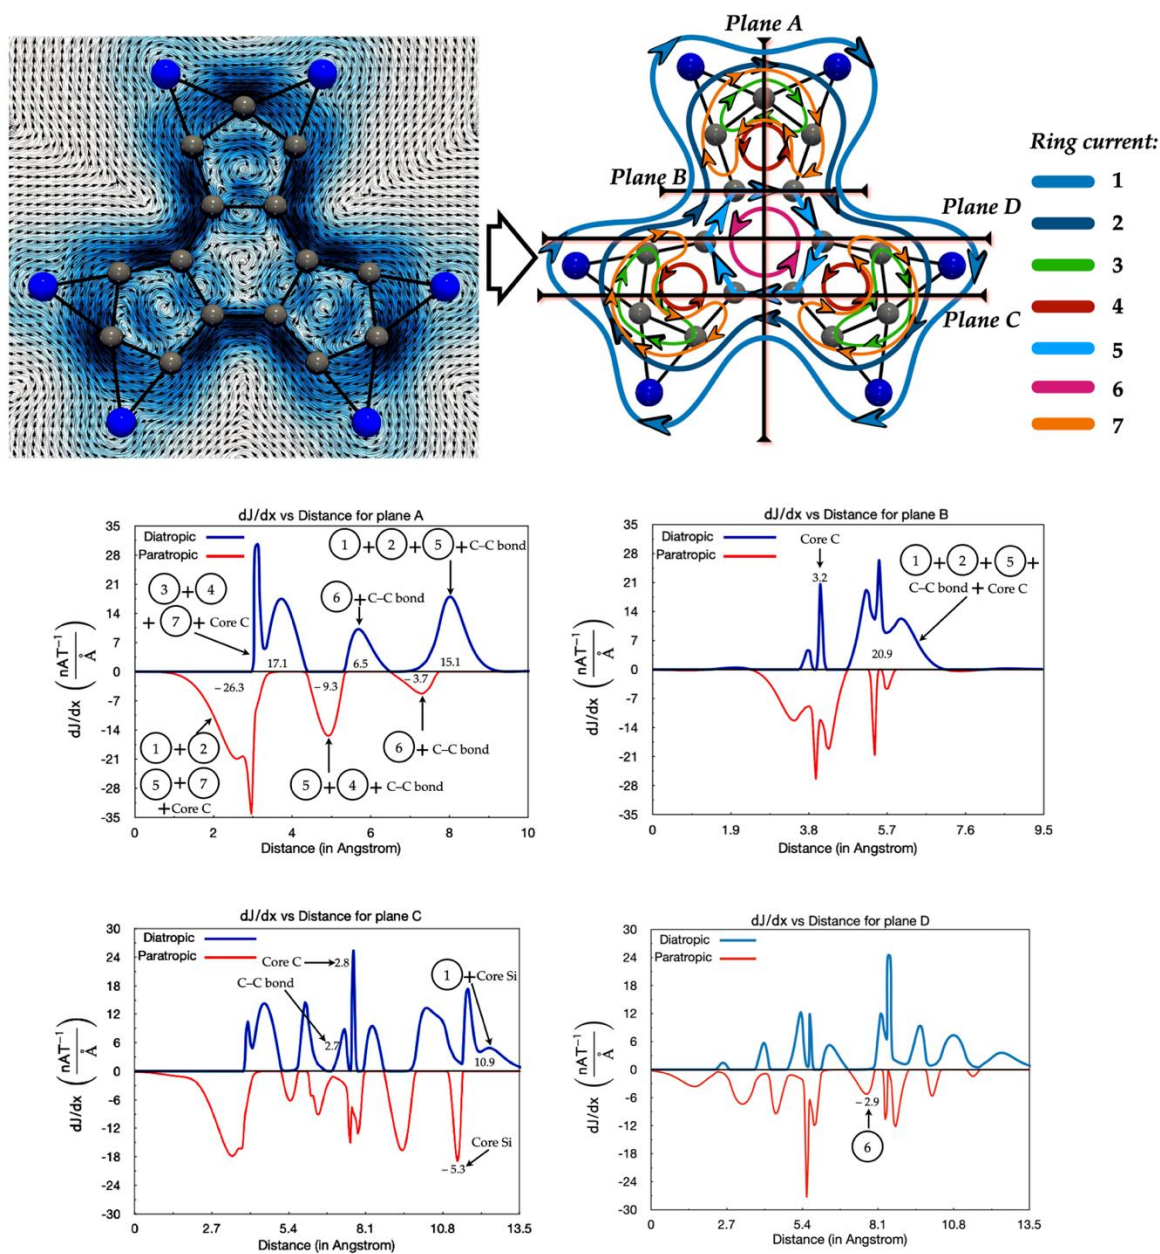

**Figure S12.** Different detected ring current circuits for  $D_{3h}$ -Ge<sub>6</sub>C<sub>15</sub> system (up) and the RCS profiles along the different integration planes (down) were used to estimate their intensity.

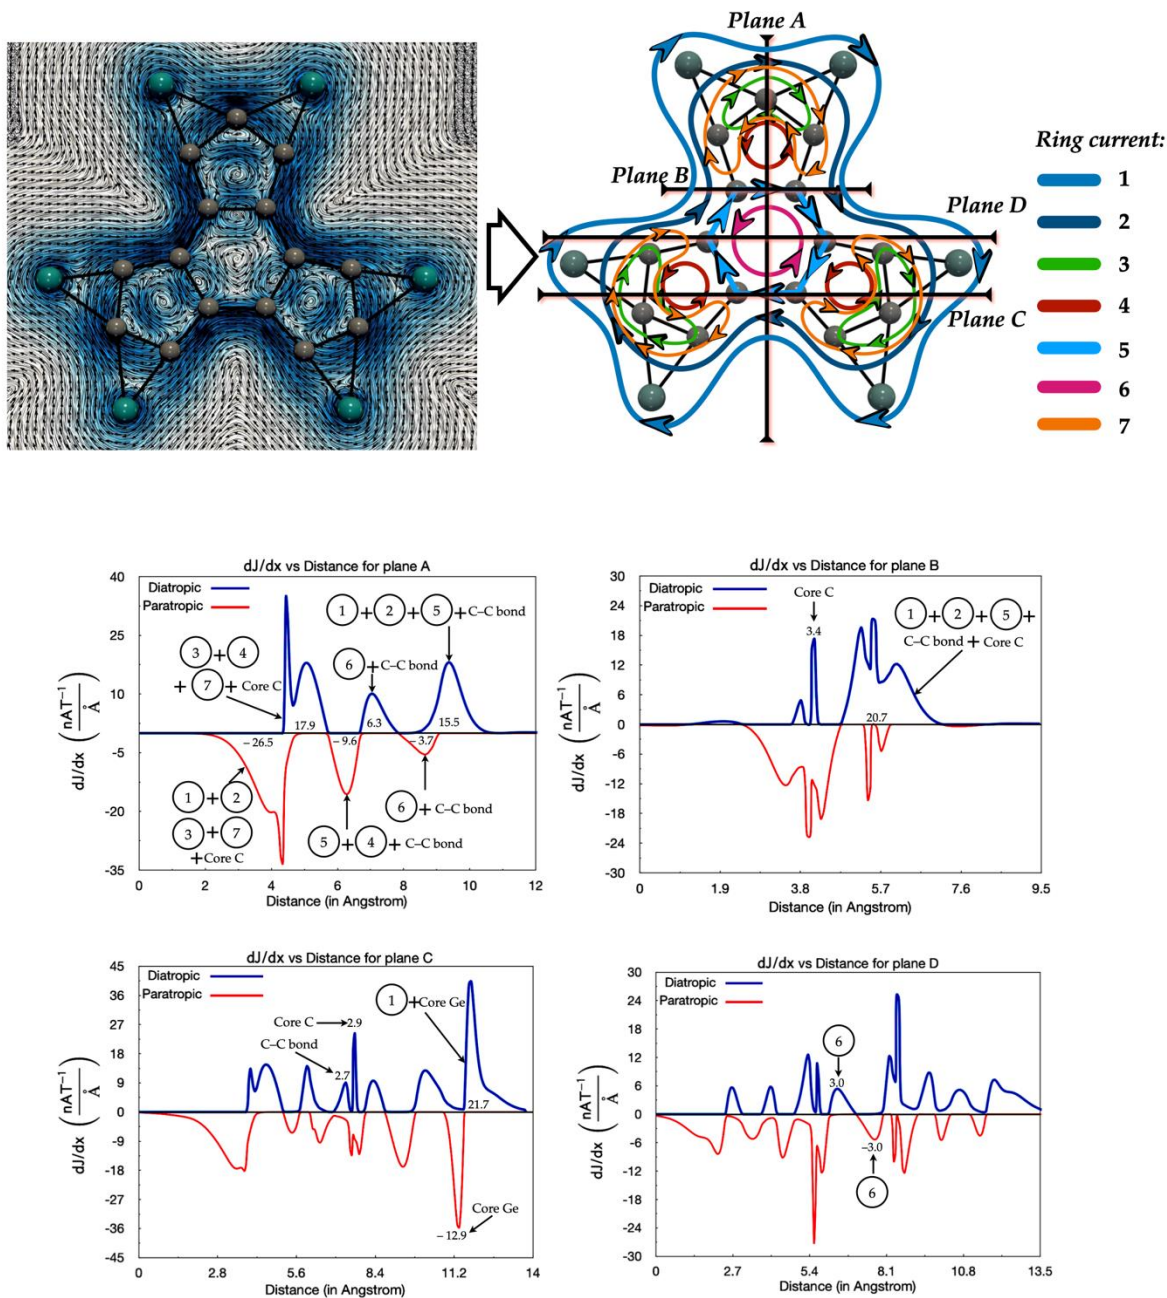

**Figure S13.** Different detected ring current circuits for the  $C_3-Sn_6C_{15}$  system (up) and the RCS profiles along the different integration planes (down) were used to estimate their intensity.

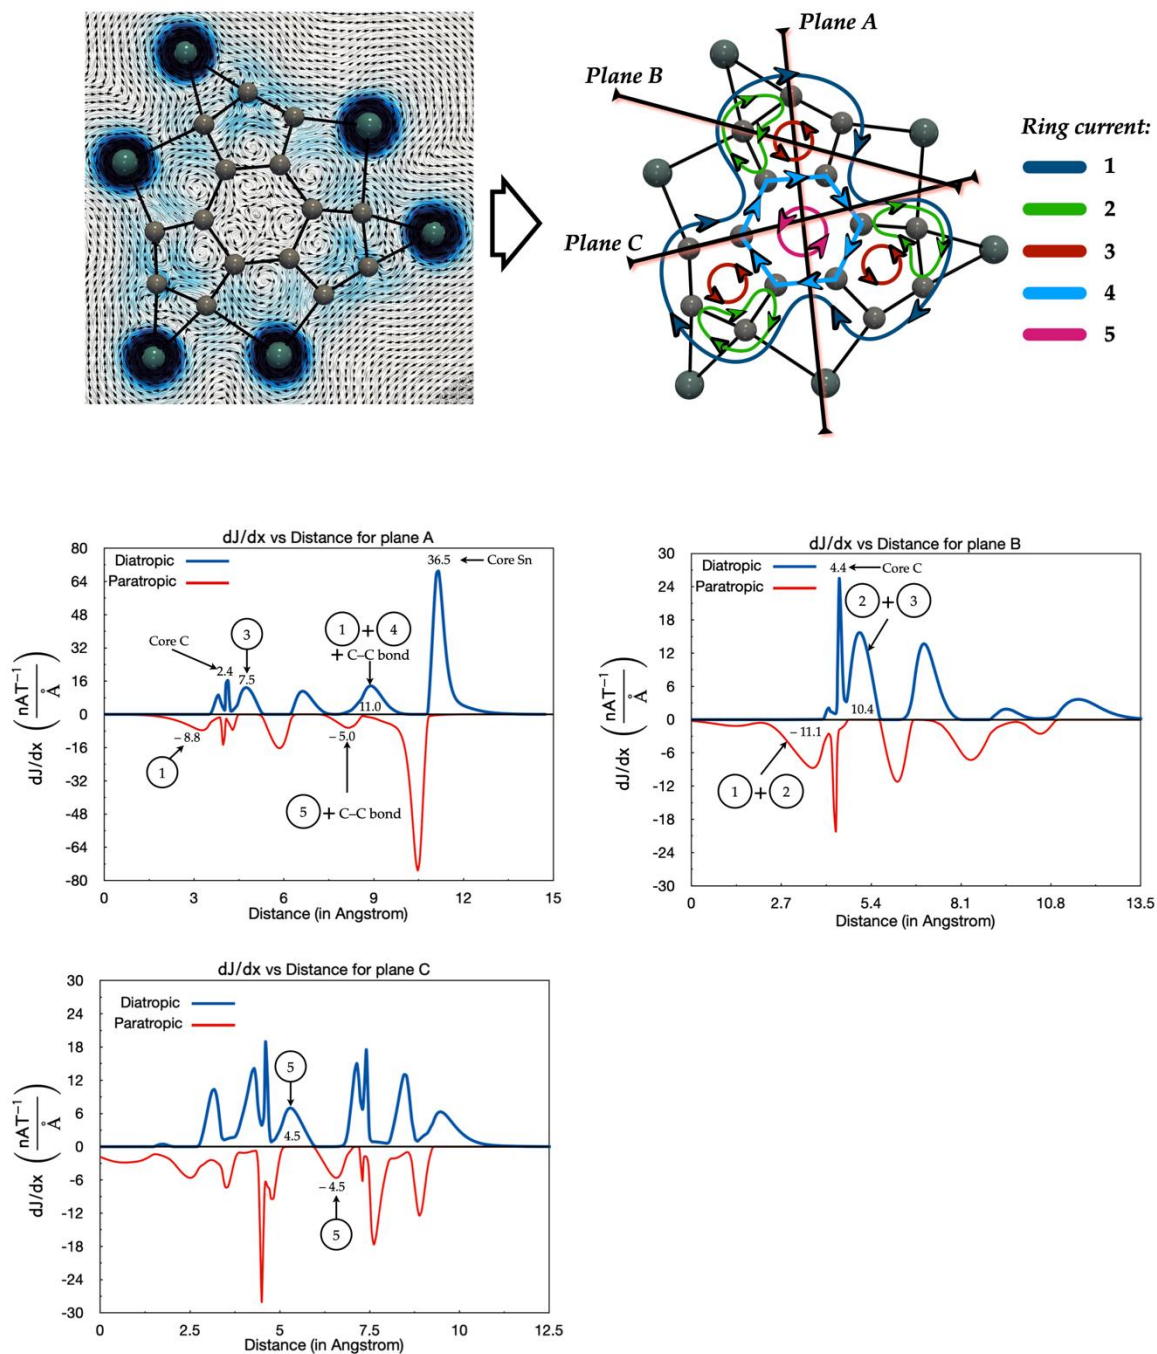

**Figure S14.** Different detected ring current circuits for the  $C_3$ - $Pb_6C_{15}$  system (up) and the RCS profiles along the different integration planes (down) were used to estimate their intensity.

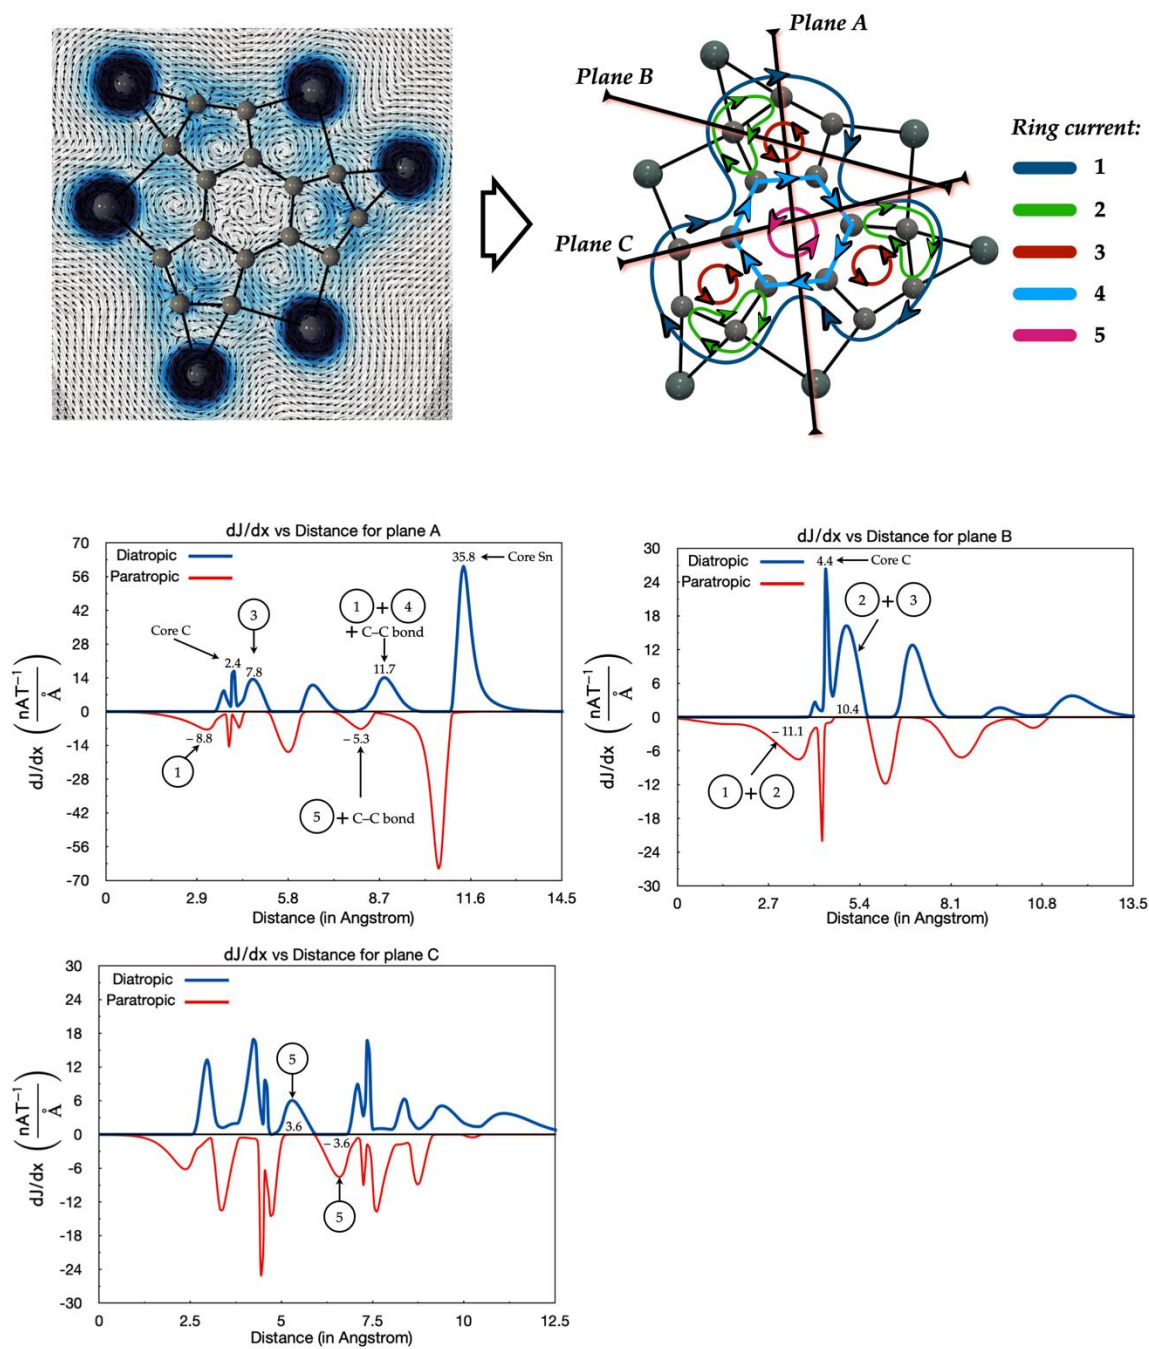

**Figure S15.** Vector plots visualization of the current density in diverse planes of the  $D_{3h}$ - $\text{Si}_6\text{C}_{15}$  system. Diatropic currents are assumed to circle clockwise.

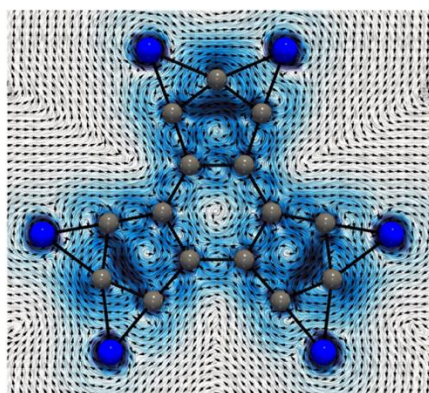

0.0Å

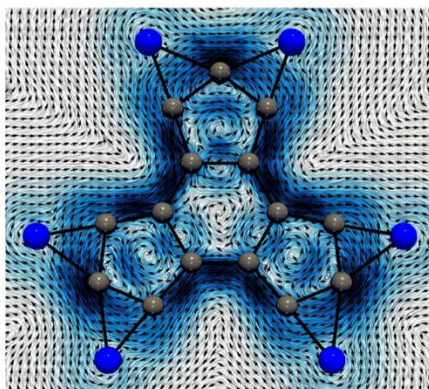

0.5Å

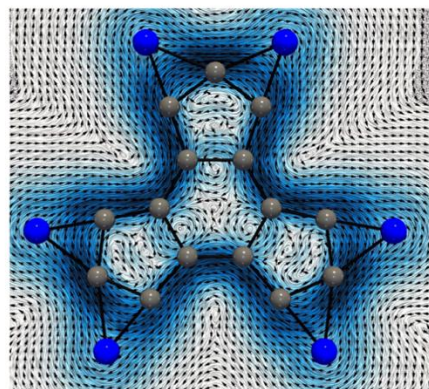

1.0Å

**Figure S16.** Vector plots visualization of the current density in diverse planes of the  $D_{3h}$ - $\text{Ge}_6\text{C}_{15}$  system. Diatropic currents are assumed to circle clockwise.

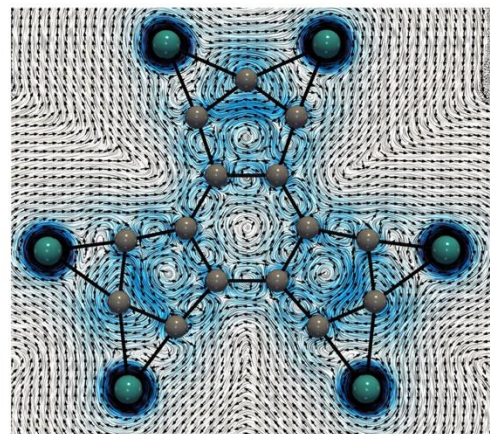

0.0Å

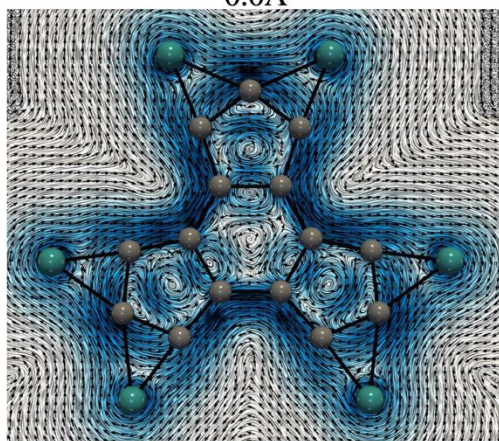

0.5Å

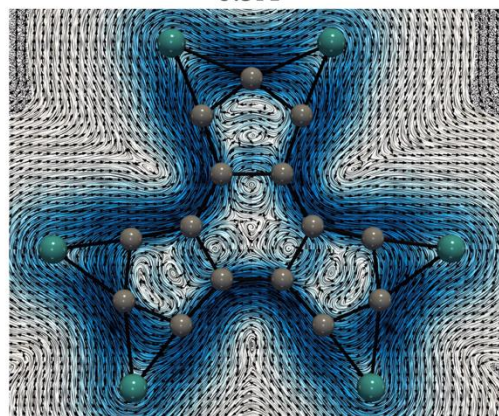

1.0Å

**Figure S17.** Vector plots visualization of the current density in diverse planes of the  $C_3$ - $Sn_6C_{15}$  system. Diatropic currents are assumed to circle clockwise.

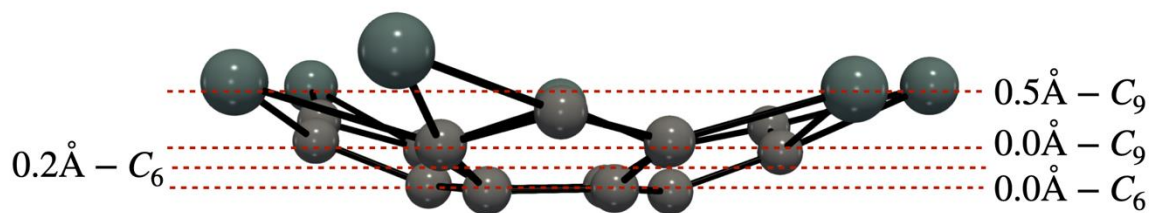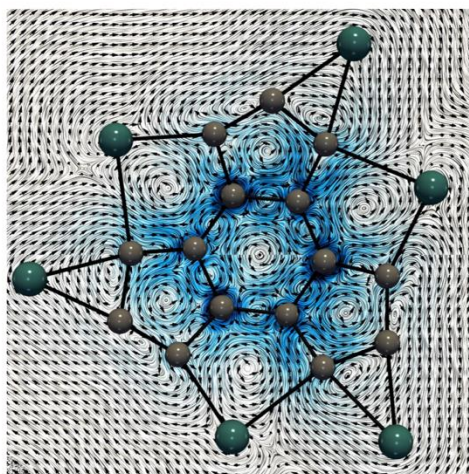

$0.0\text{\AA}$  above  $C_6$ -plane

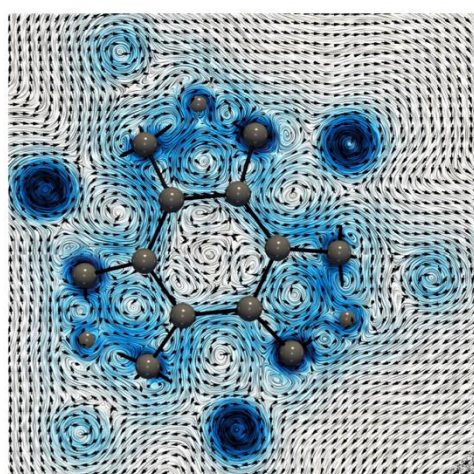

$0.0\text{\AA}$  above  $C_9$ -plane

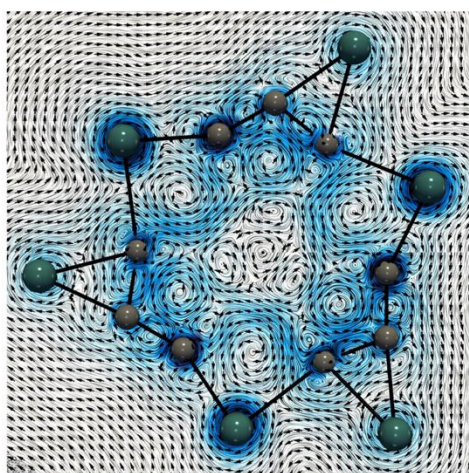

$0.2\text{\AA}$  above  $C_6$ -plane

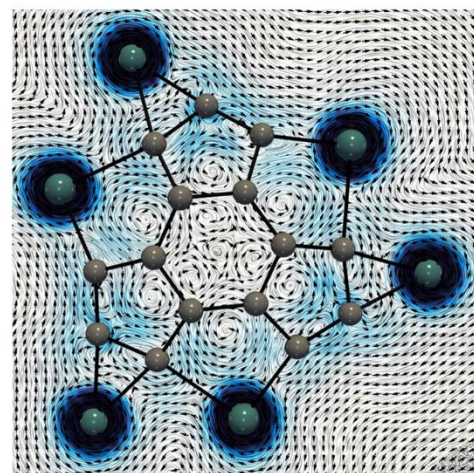

$0.5\text{\AA}$  above  $C_9$ -plane



**Figure S18.** Vector plots visualization of the current density in diverse planes of the  $C_3$ - $Pb_6C_{15}$  system. Diatropic currents are assumed to circle clockwise.

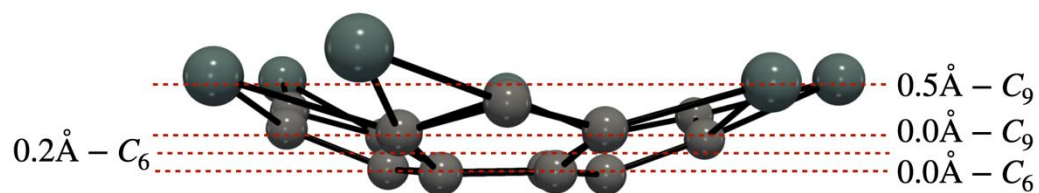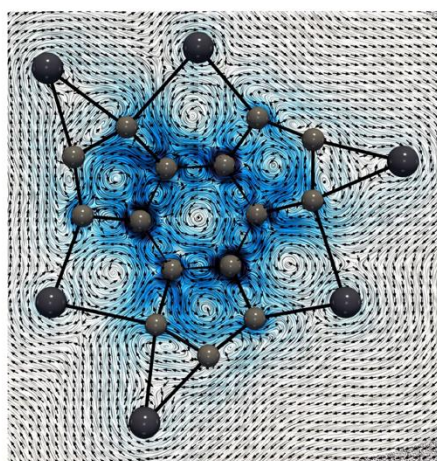

$0.0\text{\AA}$  above  $C_6$ -plane

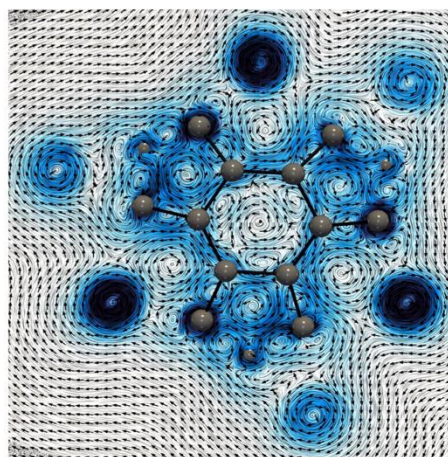

$0.0\text{\AA}$  above  $C_9$ -plane

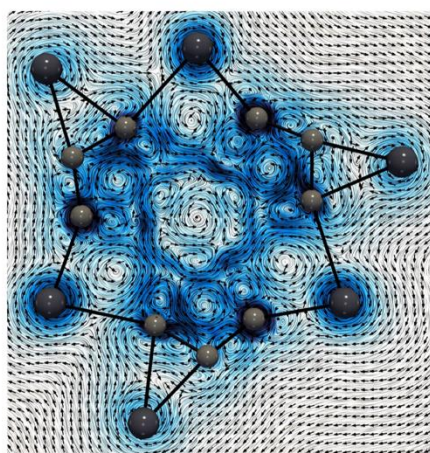

$0.2\text{\AA}$  above  $C_6$ -plane

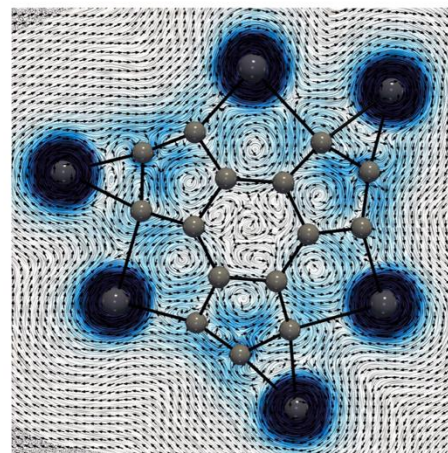

$0.5\text{\AA}$  above  $C_9$ -plane

**Figure S19.** The minimum energy geometries of the complex  $[3(\text{Si})]_2$  at PBE0-D3/def2-SVP level. The bond dissociation energies at 0 K ( $D_e$ ) and 298 K, including thermal correction and entropy factors ( $\Delta G^{298\text{K}}$ ), are given in  $\text{kcal}\cdot\text{mol}^{-1}$ .

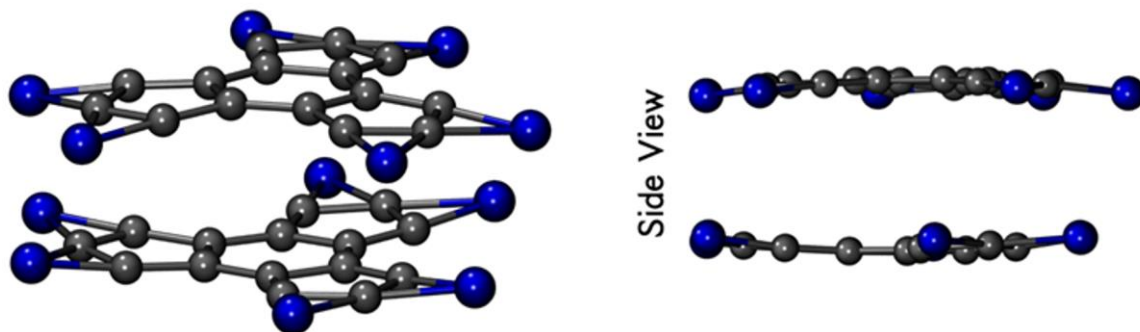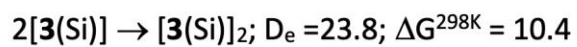

**Figure S20.** Energetic reaction cycle involving the isomerization of  $E_6C_{15}$  between isomers **3(E)** (top) and **4(E)** (bottom).

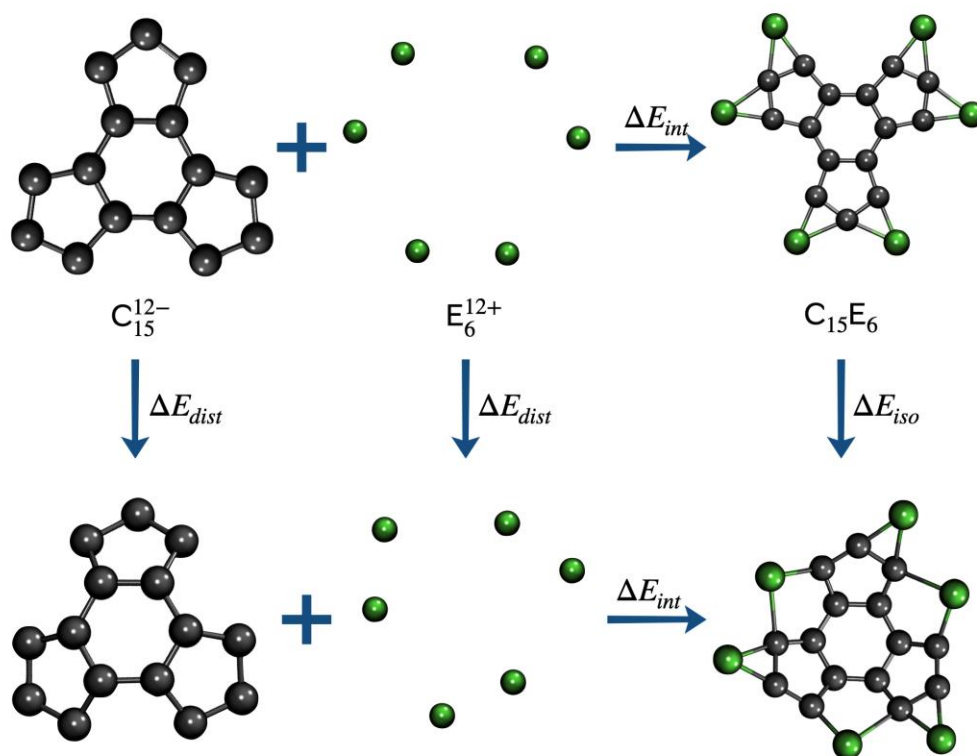

## Tables

**Table S1.** Results of the IEDA at the PBE0-D3-BJ/ZORA/TZ2P level for the  $E_6C_{15}$  systems with  $E_6^{12+} + C_{15}^{12-}$  as fragments.<sup>a</sup>

| System                          | Si <sub>6</sub> C <sub>15</sub> | Ge <sub>6</sub> C <sub>15</sub> | Sn <sub>6</sub> C <sub>15</sub> | Pb <sub>6</sub> C <sub>15</sub> |
|---------------------------------|---------------------------------|---------------------------------|---------------------------------|---------------------------------|
| $\Delta E_{iso}$                | 44.0                            | 19.9                            | -10.7                           | -24.2                           |
| $\Delta E_{dist}(E_6^{12+})$    | 729.7                           | 563.9                           | 384.4                           | 337.5                           |
| $\Delta E_{dist}(C_{15}^{12-})$ | 283.1                           | 198.9                           | 94.6                            | 72.6                            |
| $\Delta \Delta E_{int}$         | -968.8                          | -742.9                          | -489.7                          | -434.3                          |
| $\Delta \Delta E_{orb}$         | -442.7                          | -352.1                          | -282.4                          | -209.2                          |
| $\Delta \Delta V_{elstat}$      | -252.7                          | -144.8                          | -116.7                          | -96.5                           |
| $\Delta \Delta E_{Pauli}$       | -271.1                          | -244.4                          | -90.6                           | -127.2                          |
| $\Delta \Delta E_{disp}$        | -2.3                            | -1.7                            | 0.0                             | -1.4                            |

<sup>a</sup> Values in kcal·mol<sup>-1</sup>. Positive values of the components favor the **3(E)** isomer.

**Table S2.** The HOMO-LUMO energy gaps for **3(E)** and **4(E)** structures. Values in eV.

| $\Delta_{H-L}$ | Si   | Ge   | Sn   | Pb   |
|----------------|------|------|------|------|
| <b>3(E)</b>    | 4.03 | 3.63 | 2.90 | 2.59 |
| <b>4(E)</b>    | 2.71 | 2.78 | 2.35 | 2.13 |

**Table S3.** Cartesian coordinates of the  $E_6C_{18}$  global minima structures at the PBE0-D3/def2-TZVP level.

| $Si_6C_{15}$ |             |             |             | $Ge_6C_{15}$ |             |             |             |
|--------------|-------------|-------------|-------------|--------------|-------------|-------------|-------------|
| 6            | 0.00000000  | 1.41412300  | 0.00000000  | 6            | 0.00000000  | 1.41525300  | 0.00000000  |
| 6            | -1.22630800 | 0.70467800  | 0.00000000  | 6            | -1.22892700 | 0.70200000  | 0.00000000  |
| 6            | 1.22347200  | 0.70929400  | 0.00000000  | 6            | 1.22241500  | 0.71320700  | 0.00000000  |
| 6            | -1.22493500 | -0.70728300 | 0.00000000  | 6            | -1.22570300 | -0.70766100 | 0.00000000  |
| 6            | 1.22479900  | -0.70741800 | 0.00000000  | 6            | 1.22565900  | -0.70768700 | 0.00000000  |
| 6            | 0.00258200  | -1.41444800 | 0.00000000  | 6            | 0.00645700  | -1.41529200 | 0.00000000  |
| 6            | -2.29451600 | 1.64869000  | 0.00000000  | 6            | -2.29791600 | 1.64725700  | 0.00000000  |
| 6            | 2.57498400  | 1.16250400  | 0.00000000  | 6            | 2.57552000  | 1.16635100  | 0.00000000  |
| 6            | -2.29125800 | -1.65324800 | 0.00000000  | 6            | -2.29034200 | -1.65780300 | 0.00000000  |
| 6            | 2.57718600  | -1.15793700 | 0.00000000  | 6            | 2.58082200  | -1.15464800 | 0.00000000  |
| 6            | -0.28095500 | -2.81138200 | 0.00000000  | 6            | -0.27765800 | -2.81367700 | 0.00000000  |
| 6            | -0.28577300 | 2.81073500  | 0.00000000  | 6            | -0.29047700 | 2.81234200  | 0.00000000  |
| 6            | -1.72876300 | 2.98781600  | 0.00000000  | 6            | -1.72732300 | 2.97608000  | 0.00000000  |
| 6            | -1.72383800 | -2.99197700 | 0.00000000  | 6            | -1.71376700 | -2.98405700 | 0.00000000  |
| 6            | 3.45234100  | 0.00297300  | 0.00000000  | 6            | 3.44106400  | 0.00779800  | 0.00000000  |
| 14           | -0.57525700 | 4.52514900  | 0.00000000  | 32           | -0.53361800 | 4.63079000  | 0.00000000  |
| 14           | -3.63648800 | 2.75401400  | 0.00000000  | 32           | -3.75626600 | 2.76037300  | 0.00000000  |
| 14           | 4.20277800  | 1.77307200  | 0.00000000  | 32           | 4.26858700  | 1.87292600  | 0.00000000  |
| 14           | -3.63187800 | -2.76023700 | 0.00000000  | 32           | -3.74365200 | -2.77747100 | 0.00000000  |
| 14           | 4.20676700  | -1.76436800 | 0.00000000  | 32           | 4.27720500  | -1.85330500 | 0.00000000  |
| 14           | -0.56550000 | -4.52639500 | 0.00000000  | 32           | -0.51222200 | -4.63321400 | 0.00000000  |
| $Sn_6C_{15}$ |             |             |             | $Pb_6C_{15}$ |             |             |             |
| 6            | -2.92623000 | -1.38729900 | -0.00958200 | 6            | -2.70656600 | 1.83482100  | 0.29392100  |
| 6            | 2.66455100  | -1.84054000 | -0.00958200 | 6            | 2.94228400  | 1.42654400  | 0.29392100  |
| 6            | 0.26167900  | 3.22783900  | -0.00958200 | 6            | -0.23571800 | -3.26136500 | 0.29392100  |
| 6            | -1.73346000 | -2.10765700 | -0.27363100 | 82           | -4.73304000 | 1.29645000  | -0.20236800 |
| 6            | -2.73461500 | 0.03568700  | -0.34033600 | 6            | -1.41024800 | 2.36534100  | 0.53210000  |
| 6            | -0.81459500 | -1.13600500 | -0.77873700 | 6            | -2.71877100 | 0.40520900  | 0.57483400  |
| 6            | -1.40391100 | 0.13511700  | -0.81912800 | 6            | -0.62660800 | 1.25818200  | 0.96424400  |
| 6            | 1.33640100  | -2.38609000 | -0.34033600 | 6            | -1.40739800 | 0.07667000  | 0.99808300  |
| 6            | 2.69201500  | -0.44739100 | -0.27363100 | 82           | 3.48927900  | 3.45070800  | -0.20236800 |
| 6            | 0.58494100  | -1.28338100 | -0.81912800 | 6            | 1.71030700  | 2.15192000  | 0.57483400  |
| 6            | 1.39110700  | -0.13745700 | -0.77873700 | 6            | 2.75357000  | 0.03864000  | 0.53210000  |
| 6            | 1.39821400  | 2.35040300  | -0.34033600 | 6            | 0.77009700  | 1.18050700  | 0.99808300  |
| 6            | -0.95855500 | 2.55504900  | -0.27363100 | 6            | 1.40292200  | -0.08643200 | 0.96424400  |
| 6            | 0.81897000  | 1.14826400  | -0.81912800 | 82           | 1.24376200  | -4.74715800 | -0.20236800 |
| 6            | -0.57651200 | 1.27346200  | -0.77873700 | 6            | 1.00846400  | -2.55712900 | 0.57483400  |
| 50           | 2.79078900  | -3.84239200 | 0.50167600  | 6            | -1.34332200 | -2.40398200 | 0.53210000  |
| 50           | -0.56876300 | -3.76638700 | 0.31292300  | 6            | 0.63730100  | -1.25717700 | 0.99808300  |
| 50           | -4.72300300 | -0.49569800 | 0.50167600  | 6            | -0.77631300 | -1.17175000 | 0.96424400  |
| 50           | -2.97740600 | 2.37575700  | 0.31292300  | 82           | 0.00000000  | 3.95560900  | -0.04371800 |
| 50           | 1.93221500  | 4.33809000  | 0.50167600  | 82           | 3.42565800  | -1.97780400 | -0.04371800 |
| 50           | 3.54616800  | 1.39063100  | 0.31292300  | 82           | -3.42565800 | -1.97780400 | -0.04371800 |

**Table S4.** Cartesian coordinates of 3(E) and 4(E) optimized structures at the PBE0-D3/def2-TZVP level.

| 3(Si) |              |              |             | 4(Si) |              |              |              |
|-------|--------------|--------------|-------------|-------|--------------|--------------|--------------|
| 6     | 0.00000000   | 1.414123000  | 0.000000000 | 6     | 0.000000000  | 2.943260000  | -0.126176000 |
| 6     | -1.226308000 | 0.704678000  | 0.000000000 | 6     | 2.548938000  | -1.471630000 | -0.126176000 |
| 6     | 1.223472000  | 0.709294000  | 0.000000000 | 6     | -2.548938000 | -1.471630000 | -0.126176000 |
| 6     | -1.224935000 | -0.707283000 | 0.000000000 | 6     | 1.145756000  | 2.265962000  | 0.329519000  |
| 6     | 1.224799000  | -0.707418000 | 0.000000000 | 6     | -1.236579000 | 2.279069000  | 0.422730000  |
| 6     | 0.002582000  | -1.414448000 | 0.000000000 | 6     | 0.675096000  | 1.213211000  | 1.164402000  |
| 6     | -2.294516000 | 1.648690000  | 0.000000000 | 6     | -0.727302000 | 1.220778000  | 1.233242000  |
| 6     | 2.574984000  | 1.162504000  | 0.000000000 | 6     | 2.592021000  | -0.068625000 | 0.422730000  |
| 6     | -2.291258000 | -1.653248000 | 0.000000000 | 6     | 1.389503000  | -2.125235000 | 0.329519000  |
| 6     | 2.577186000  | -1.157937000 | 0.000000000 | 6     | 1.420876000  | 0.019473000  | 1.233242000  |
| 6     | -0.280955000 | -2.811382000 | 0.000000000 | 6     | 0.713123000  | -1.191256000 | 1.164402000  |
| 6     | -0.285773000 | 2.810735000  | 0.000000000 | 6     | -1.355442000 | -2.210444000 | 0.422730000  |
| 6     | -1.728763000 | 2.987816000  | 0.000000000 | 6     | -2.535259000 | -0.140727000 | 0.329519000  |
| 6     | -1.723838000 | -2.991977000 | 0.000000000 | 6     | -0.693574000 | -1.240251000 | 1.233242000  |
| 6     | 3.452341000  | 0.002973000  | 0.000000000 | 6     | -1.388219000 | -0.021955000 | 1.164402000  |
| 14    | -0.575257000 | 4.525149000  | 0.000000000 | 14    | -2.517192000 | -3.085320000 | -0.854075000 |
| 14    | -3.636488000 | 2.754014000  | 0.000000000 | 14    | 3.930561000  | -0.637292000 | -0.854075000 |
| 14    | 4.202778000  | 1.773072000  | 0.000000000 | 14    | -1.413369000 | 3.722612000  | -0.854075000 |
| 14    | -3.631878000 | -2.760237000 | 0.000000000 | 14    | 0.184225000  | -3.313707000 | -0.441803000 |
| 14    | 4.206767000  | -1.764368000 | 0.000000000 | 14    | 2.777642000  | 1.816397000  | -0.441803000 |
| 14    | -0.565500000 | -4.526395000 | 0.000000000 | 14    | -2.961867000 | 1.497310000  | -0.441803000 |
| 3(Ge) |              |              |             | 4(Ge) |              |              |              |
| 6     | 0.000000000  | 1.415253000  | 0.000000000 | 6     | 0.000000000  | 3.067487000  | 0.160571000  |
| 6     | -1.228927000 | 0.702000000  | 0.000000000 | 6     | 2.656522000  | -1.533743000 | 0.160571000  |
| 6     | 1.222415000  | 0.713207000  | 0.000000000 | 6     | -2.656522000 | -1.533743000 | 0.160571000  |
| 6     | -1.225703000 | -0.707661000 | 0.000000000 | 6     | 1.164490000  | 2.346958000  | 0.546869000  |
| 6     | 1.225659000  | -0.707687000 | 0.000000000 | 6     | -1.204097000 | 2.358665000  | 0.619983000  |
| 6     | 0.006457000  | -1.415292000 | 0.000000000 | 6     | 0.684677000  | 1.213539000  | 1.262183000  |
| 6     | -2.297916000 | 1.647257000  | 0.000000000 | 6     | -0.721175000 | 1.218288000  | 1.321383000  |
| 6     | 2.575520000  | 1.166351000  | 0.000000000 | 6     | 2.644712000  | -0.136554000 | 0.619983000  |
| 6     | -2.290342000 | -1.657803000 | 0.000000000 | 6     | 1.450280000  | -2.181957000 | 0.546869000  |
| 6     | 2.580822000  | -1.154648000 | 0.000000000 | 6     | 1.415655000  | 0.015412000  | 1.321383000  |
| 6     | -0.277658000 | -2.813677000 | 0.000000000 | 6     | 0.708618000  | -1.199717000 | 1.262183000  |
| 6     | -0.290477000 | 2.812342000  | 0.000000000 | 6     | -1.440616000 | -2.222111000 | 0.619983000  |
| 6     | -1.727323000 | 2.976080000  | 0.000000000 | 6     | -2.614770000 | -0.165001000 | 0.546869000  |
| 6     | -1.713767000 | -2.984057000 | 0.000000000 | 6     | -0.694481000 | -1.233699000 | 1.321383000  |
| 6     | 3.441064000  | 0.007798000  | 0.000000000 | 6     | -1.393294000 | -0.013822000 | 1.262183000  |
| 32    | -0.533618000 | 4.630790000  | 0.000000000 | 32    | -2.781928000 | -3.277881000 | -0.492752000 |
| 32    | -3.756266000 | 2.760373000  | 0.000000000 | 32    | 4.229692000  | -0.770280000 | -0.492752000 |
| 32    | 4.268587000  | 1.872926000  | 0.000000000 | 32    | -1.447764000 | 4.048161000  | -0.492752000 |
| 32    | -3.743652000 | -2.777471000 | 0.000000000 | 32    | 0.276163000  | -3.483950000 | -0.240558000 |
| 32    | 4.277205000  | -1.853305000 | 0.000000000 | 32    | 2.879107000  | 1.981139000  | -0.240558000 |
| 32    | -0.512222000 | -4.633214000 | 0.000000000 | 32    | -3.155271000 | 1.502810000  | -0.240558000 |
| 3(Sn) |              |              |             | 4(Sn) |              |              |              |
| 6     | -1.234780000 | -0.699640000 | 0.000000000 | 6     | -2.926230000 | -1.387299000 | -0.009582000 |
| 6     | 0.000000000  | -1.419194000 | 0.000000000 | 6     | 2.664551000  | -1.840540000 | -0.009582000 |
| 6     | -1.229078000 | 0.709621000  | 0.000000000 | 6     | 0.261679000  | 3.227839000  | -0.009582000 |
| 6     | 1.223301000  | -0.719498000 | 0.000000000 | 6     | -1.733460000 | -2.107657000 | -0.273631000 |
| 6     | 0.011473000  | 1.419159000  | 0.000000000 | 6     | -2.734615000 | 0.035687000  | -0.340336000 |
| 6     | 1.229077000  | 0.709595000  | 0.000000000 | 6     | -0.814595000 | -1.136005000 | -0.778737000 |
| 6     | -0.287770000 | -2.816625000 | 0.000000000 | 6     | -1.403911000 | 0.135117000  | -0.819128000 |
| 6     | -2.295377000 | 1.657593000  | 0.000000000 | 6     | 1.336401000  | -2.386090000 | -0.340336000 |
| 6     | 2.573731000  | -1.179891000 | 0.000000000 | 6     | 2.692015000  | -0.447391000 | -0.273631000 |
| 6     | -0.264987000 | 2.818869000  | 0.000000000 | 6     | 0.584941000  | -1.283381000 | -0.819128000 |
| 6     | 2.583178000  | 1.159065000  | 0.000000000 | 6     | 1.391107000  | -0.137457000 | -0.778737000 |

|              |              |              |             |              |              |              |              |
|--------------|--------------|--------------|-------------|--------------|--------------|--------------|--------------|
| 6            | -2.308722000 | -1.638949000 | 0.000000000 | 6            | 1.398214000  | 2.350403000  | -0.340336000 |
| 6            | -1.719769000 | -2.951148000 | 0.000000000 | 6            | -0.958555000 | 2.555049000  | -0.273631000 |
| 6            | 3.415766000  | -0.013801000 | 0.000000000 | 6            | 0.818970000  | 1.148264000  | -0.819128000 |
| 6            | -1.695848000 | 2.965017000  | 0.000000000 | 6            | -0.576512000 | 1.273462000  | -0.778737000 |
| 50           | -3.958736000 | -2.821621000 | 0.000000000 | 50           | 2.790789000  | -3.842392000 | 0.501676000  |
| 50           | -0.503134000 | -4.835236000 | 0.000000000 | 50           | -0.568763000 | -3.766387000 | 0.312923000  |
| 50           | -3.935870000 | 2.853400000  | 0.000000000 | 50           | -4.723003000 | -0.495698000 | 0.501676000  |
| 50           | 4.422802000  | -2.017787000 | 0.000000000 | 50           | -2.977406000 | 2.375757000  | 0.312923000  |
| 50           | -0.463994000 | 4.839154000  | 0.000000000 | 50           | 1.932215000  | 4.338090000  | 0.501676000  |
| 50           | 4.438910000  | 1.982069000  | 0.000000000 | 50           | 3.546168000  | 1.390631000  | 0.312923000  |
| <b>3(Pb)</b> |              |              |             | <b>4(Pb)</b> |              |              |              |
| 6            | 1.237990000  | 0.696692000  | 0.000000000 | 6            | -2.706566000 | 1.834821000  | 0.293921000  |
| 6            | 0.000000000  | 1.420545000  | 0.000000000 | 6            | 2.942284000  | 1.426544000  | 0.293921000  |
| 6            | 1.230246000  | -0.710426000 | 0.000000000 | 6            | -0.235718000 | -3.261365000 | 0.293921000  |
| 6            | -1.222452000 | 0.723680000  | 0.000000000 | 82           | -4.733040000 | 1.296450000  | -0.202368000 |
| 6            | -0.015616000 | -1.420622000 | 0.000000000 | 6            | -1.410248000 | 2.365341000  | 0.532100000  |
| 6            | -1.230341000 | -0.710356000 | 0.000000000 | 6            | -2.718771000 | 0.405209000  | 0.574834000  |
| 6            | 0.293717000  | 2.818499000  | 0.000000000 | 6            | -0.626608000 | 1.258182000  | 0.964244000  |
| 6            | 2.294039000  | -1.663783000 | 0.000000000 | 6            | -1.407398000 | 0.076670000  | 0.998083000  |
| 6            | -2.575003000 | 1.183166000  | 0.000000000 | 82           | 3.489279000  | 3.450708000  | -0.202368000 |
| 6            | 0.262731000  | -2.821723000 | 0.000000000 | 6            | 1.710307000  | 2.151920000  | 0.574834000  |
| 6            | -2.587873000 | -1.154927000 | 0.000000000 | 6            | 2.753570000  | 0.038640000  | 0.532100000  |
| 6            | 2.312206000  | 1.638299000  | 0.000000000 | 6            | 0.770097000  | 1.180507000  | 0.998083000  |
| 6            | 1.718359000  | 2.938866000  | 0.000000000 | 6            | 1.402922000  | -0.086432000 | 0.964244000  |
| 6            | -3.404518000 | 0.018664000  | 0.000000000 | 82           | 1.243762000  | -4.747158000 | -0.202368000 |
| 6            | 1.685964000  | -2.957770000 | 0.000000000 | 6            | 1.008464000  | -2.557129000 | 0.574834000  |
| 82           | 4.060888000  | 2.830282000  | 0.000000000 | 6            | -1.343322000 | -2.403982000 | 0.532100000  |
| 82           | 0.474525000  | 4.927006000  | 0.000000000 | 6            | 0.637301000  | -1.257177000 | 0.998083000  |
| 82           | 4.029668000  | -2.874553000 | 0.000000000 | 6            | -0.776313000 | -1.171750000 | 0.964244000  |
| 82           | -4.481293000 | 2.102073000  | 0.000000000 | 82           | 0.000000000  | 3.955609000  | -0.043718000 |
| 82           | 0.420523000  | -4.932076000 | 0.000000000 | 82           | 3.425658000  | -1.977804000 | -0.043718000 |
| 82           | -4.504271000 | -2.052644000 | 0.000000000 | 82           | -3.425658000 | -1.977804000 | -0.043718000 |

**Table S5.** Cartesian coordinates for 3(Si) complexes optimized at the PBE0-D3/def2-TZVP level, except for sandwich and dimer complexes for which def2-SVP is used.

| 3Si·(BH <sub>3</sub> ) <sub>6</sub> |              |              |              | 3Si·[12]CPP |              |              |              |
|-------------------------------------|--------------|--------------|--------------|-------------|--------------|--------------|--------------|
| 6                                   | 2.709464000  | -2.124520000 | -0.035132000 | 6           | -3.760809000 | 7.411456000  | 0.180845000  |
| 6                                   | -3.194280000 | -1.283525000 | -0.016376000 | 6           | -2.986370000 | 7.346962000  | -0.978565000 |
| 6                                   | 0.485754000  | 3.408554000  | 0.000987000  | 6           | -1.666012000 | 7.753769000  | -0.978610000 |
| 14                                  | 2.225295000  | -3.950683000 | -0.042930000 | 6           | -1.062057000 | 8.242838000  | 0.180784000  |
| 14                                  | 4.367607000  | -1.219301000 | -0.032095000 | 6           | -1.880982000 | 8.453968000  | 1.292907000  |
| 6                                   | 1.300967000  | -2.503686000 | -0.034830000 | 6           | -3.202609000 | 8.046840000  | 1.292929000  |
| 6                                   | 2.742031000  | -0.666333000 | -0.027576000 | 6           | 0.407864000  | 8.271743000  | 0.261794000  |
| 6                                   | 0.528114000  | -1.313332000 | -0.027667000 | 6           | 1.213855000  | 8.511649000  | -0.853326000 |
| 6                                   | 1.401794000  | -0.199388000 | -0.023179000 | 6           | 2.550871000  | 8.159238000  | -0.856032000 |
| 14                                  | -3.239308000 | -3.172297000 | -0.025538000 | 6           | 3.139505000  | 7.555808000  | 1.284780000  |
| 14                                  | -4.533776000 | 0.048609000  | -0.004216000 | 6           | 2.370397000  | 7.456150000  | 1.417591000  |
| 6                                   | -1.947689000 | -2.041001000 | -0.024653000 | 6           | 1.033190000  | 7.805870000  | 1.419213000  |
| 6                                   | -2.818396000 | 0.125606000  | -0.009834000 | 6           | 4.423822000  | 6.839342000  | 0.180066000  |
| 6                                   | -0.873163000 | -1.113728000 | -0.023139000 | 6           | 4.726053000  | 6.105048000  | -0.967689000 |
| 6                                   | -1.401020000 | 0.199810000  | -0.014228000 | 6           | 5.738672000  | 5.164831000  | -0.967713000 |
| 14                                  | -1.127267000 | 4.391890000  | 0.014067000  | 6           | 6.493338000  | 4.917760000  | 0.180022000  |
| 14                                  | 2.309328000  | 3.902471000  | -0.004526000 | 6           | 6.278740000  | 5.745558000  | 1.284419000  |
| 6                                   | -0.793275000 | 2.707658000  | -0.001448000 | 6           | 5.265260000  | 6.686589000  | 1.284440000  |
| 6                                   | 1.518432000  | 2.378424000  | -0.007612000 | 6           | 7.302958000  | 3.690028000  | 0.257676000  |
| 6                                   | -0.527557000 | 1.313562000  | -0.009968000 | 6           | 7.948189000  | 3.147652000  | -0.856176000 |
| 6                                   | 0.874038000  | 1.113950000  | -0.013940000 | 6           | 8.398630000  | 1.840390000  | -0.853456000 |
| 5                                   | -1.924644000 | 6.176792000  | -0.115660000 | 6           | 8.219201000  | 1.018893000  | 0.261713000  |
| 5                                   | 3.570958000  | 5.395760000  | 0.127607000  | 6           | 7.708401000  | 1.608058000  | 1.419161000  |
| 5                                   | 6.313181000  | -1.425078000 | 0.076802000  | 6           | 7.260647000  | 2.915696000  | 1.417531000  |
| 5                                   | 2.892089000  | -5.790670000 | 0.054504000  | 6           | 8.299158000  | -0.449141000 | 0.180731000  |
| 5                                   | -4.398512000 | -4.750435000 | 0.054120000  | 6           | 7.856181000  | -1.087702000 | -0.978639000 |
| 5                                   | -6.458909000 | 0.392032000  | 0.120035000  | 6           | 7.548244000  | -2.434557000 | -0.978522000 |
| 1                                   | 3.437988000  | 5.639201000  | 1.308311000  | 6           | 7.669803000  | -3.202033000 | 0.180941000  |
| 1                                   | 4.603549000  | 4.845618000  | -0.172203000 | 6           | 8.262101000  | -2.598284000 | 1.293013000  |
| 1                                   | 3.141140000  | 6.230241000  | -0.626426000 | 6           | 8.570293000  | -1.250150000 | 1.292905000  |
| 1                                   | -1.742033000 | 6.361312000  | -1.300899000 | 6           | 6.959844000  | -4.489447000 | 0.262039000  |
| 1                                   | -3.066519000 | 5.938171000  | 0.197055000  | 6           | 6.764525000  | -5.307411000 | -0.853059000 |
| 1                                   | -1.271734000 | 6.866335000  | 0.624001000  | 6           | 5.790679000  | -6.288948000 | -0.855760000 |
| 1                                   | -6.625118000 | 0.109778000  | 1.287225000  | 6           | 4.973776000  | -6.496897000 | 0.258067000  |
| 1                                   | -6.492423000 | 1.571611000  | -0.137794000 | 6           | 5.272117000  | -5.781043000 | 1.417880000  |
| 1                                   | -6.953961000 | -0.367027000 | -0.673293000 | 6           | 6.243679000  | -4.797936000 | 1.419468000  |
| 1                                   | -4.790980000 | -4.659087000 | 1.196256000  | 6           | 3.711064000  | -7.250778000 | 0.180332000  |
| 1                                   | -5.226724000 | -4.544818000 | -0.797129000 | 6           | 2.923950000  | -7.145001000 | -0.967331000 |
| 1                                   | -3.593815000 | -5.626821000 | -0.154744000 | 6           | 1.603395000  | -7.551850000 | -0.967388000 |
| 1                                   | 3.221261000  | -5.813144000 | 1.220821000  | 6           | 1.012174000  | -8.082300000 | 0.180200000  |
| 1                                   | 1.888111000  | -6.406565000 | -0.213298000 | 6           | 1.836428000  | -8.310601000 | 1.284502000  |
| 1                                   | 3.796164000  | -5.824926000 | -0.740778000 | 6           | 3.158118000  | -7.903377000 | 1.284571000  |
| 1                                   | 6.405410000  | -1.724447000 | 1.247902000  | 6           | -0.455878000 | -8.169697000 | 0.257805000  |
| 1                                   | 6.569842000  | -2.303876000 | -0.705704000 | 6           | -1.248111000 | -8.457085000 | -0.856186000 |
| 1                                   | 6.671448000  | -0.305526000 | -0.201428000 | 6           | -2.605425000 | -8.193471000 | -0.853575000 |
|                                     |              |              |              | 6           | -3.227226000 | -7.627449000 | 0.261619000  |
|                                     |              |              |              | 6           | -2.461753000 | -7.479996000 | 1.419199000  |
|                                     |              |              |              | 6           | -1.105435000 | -7.746138000 | 1.417678000  |
|                                     |              |              |              | 6           | -4.538518000 | -6.962615000 | 0.180563000  |
|                                     |              |              |              | 6           | -4.869812000 | -6.259521000 | -0.978771000 |
|                                     |              |              |              | 6           | -5.882262000 | -5.319430000 | -0.978728000 |
|                                     |              |              |              | 6           | -6.607945000 | -5.041139000 | 0.180619000  |
|                                     |              |              |              | 6           | -6.381392000 | -5.856070000 | 1.292637000  |
|                                     |              |              |              | 6           | -5.367947000 | -6.797023000 | 1.292616000  |
|                                     |              |              |              | 6           | -7.368125000 | -3.782715000 | 0.261655000  |
|                                     |              |              |              | 6           | -7.978362000 | -3.204419000 | -0.853633000 |
|                                     |              |              |              | 6           | -8.341742000 | -1.870357000 | -0.856211000 |

|  |   |              |              |              |
|--|---|--------------|--------------|--------------|
|  | 6 | -8.114097000 | -1.059110000 | 0.257909000  |
|  | 6 | -7.643951000 | -1.675639000 | 1.417857000  |
|  | 6 | -7.278117000 | -3.008538000 | 1.419344000  |
|  | 6 | -8.135546000 | 0.411380000  | 0.180332000  |
|  | 6 | -7.650218000 | 1.040186000  | -0.967240000 |
|  | 6 | -7.342164000 | 2.387210000  | -0.967204000 |
|  | 6 | -7.505950000 | 3.164380000  | 0.180420000  |
|  | 6 | -8.115934000 | 2.564712000  | 1.284641000  |
|  | 6 | -8.424265000 | 1.216512000  | 1.284596000  |
|  | 6 | -6.847534000 | 4.479403000  | 0.258063000  |
|  | 6 | -6.700326000 | 5.309223000  | -0.855899000 |
|  | 6 | -5.793360000 | 6.352874000  | -0.853276000 |
|  | 6 | -4.992246000 | 6.608305000  | 0.261907000  |
|  | 6 | -5.247242000 | 5.871601000  | 1.419465000  |
|  | 6 | -6.155881000 | 4.830064000  | 1.417931000  |
|  | 1 | -3.384539000 | 6.856999000  | -1.859407000 |
|  | 1 | -1.061187000 | 7.572800000  | -1.859473000 |
|  | 1 | -1.462670000 | 8.899873000  | 2.188681000  |
|  | 1 | -3.799292000 | 8.180072000  | 2.188723000  |
|  | 1 | 0.775148000  | 8.936402000  | -1.749496000 |
|  | 1 | 3.140027000  | 8.315159000  | -1.753112000 |
|  | 1 | 2.793204000  | 6.988717000  | 2.299559000  |
|  | 1 | 0.438081000  | 7.600860000  | 2.301650000  |
|  | 1 | 4.087380000  | 6.191817000  | -1.839333000 |
|  | 1 | 5.872502000  | 4.534386000  | -1.839393000 |
|  | 1 | 6.891551000  | 5.623625000  | 2.170899000  |
|  | 1 | 5.098304000  | 7.288665000  | 2.170941000  |
|  | 1 | 8.059933000  | 3.746675000  | -1.753310000 |
|  | 1 | 8.854597000  | 1.434310000  | -1.749666000 |
|  | 1 | 7.548095000  | 0.999437000  | 2.301635000  |
|  | 1 | 6.763289000  | 3.302782000  | 2.299531000  |
|  | 1 | 7.631039000  | -0.498020000 | -1.859593000 |
|  | 1 | 7.089144000  | -2.867984000 | -1.859348000 |
|  | 1 | 8.439111000  | -3.183413000 | 2.188847000  |
|  | 1 | 8.984012000  | -0.799940000 | 2.188659000  |
|  | 1 | 7.351714000  | -5.139911000 | -1.749247000 |
|  | 1 | 5.630992000  | -6.877075000 | -1.752852000 |
|  | 1 | 4.655878000  | -5.913399000 | 2.299844000  |
|  | 1 | 6.363710000  | -4.179976000 | 2.301850000  |
|  | 1 | 3.318377000  | -6.635006000 | -1.838840000 |
|  | 1 | 0.990438000  | -7.352207000 | -1.838948000 |
|  | 1 | 1.424498000  | -8.780629000 | 2.170866000  |
|  | 1 | 3.763069000  | -8.060070000 | 2.170989000  |
|  | 1 | -0.785147000 | -8.853306000 | -1.753313000 |
|  | 1 | -3.185003000 | -8.385132000 | -1.749875000 |
|  | 1 | -2.908791000 | -7.037028000 | 2.301707000  |
|  | 1 | -0.521628000 | -7.509155000 | 2.299799000  |
|  | 1 | -4.246394000 | -6.359264000 | -1.859616000 |
|  | 1 | -6.027823000 | -4.704992000 | -1.859495000 |
|  | 1 | -6.976790000 | -5.716908000 | 2.188384000  |
|  | 1 | -5.185019000 | -7.380473000 | 2.188357000  |
|  | 1 | -8.126363000 | -3.796507000 | -1.750028000 |
|  | 1 | -8.770891000 | -1.437911000 | -1.753421000 |
|  | 1 | -7.451079000 | -1.075996000 | 2.300102000  |
|  | 1 | -6.803573000 | -3.421631000 | 2.301978000  |
|  | 1 | -7.405703000 | 0.443635000  | -1.838747000 |
|  | 1 | -6.862690000 | 2.818260000  | -1.838694000 |
|  | 1 | -8.317000000 | 3.156439000  | 2.171031000  |
|  | 1 | -8.862564000 | 0.770959000  | 2.170954000  |
|  | 1 | -7.274926000 | 5.106374000  | -1.753036000 |
|  | 1 | -5.669546000 | 6.950649000  | -1.749563000 |
|  | 1 | -4.640079000 | 6.037234000  | 2.301963000  |



|                                              |              |              |              |                        |              |              |              |
|----------------------------------------------|--------------|--------------|--------------|------------------------|--------------|--------------|--------------|
|                                              |              |              |              | 1                      | -6.242530000 | 4.205924000  | 2.300016000  |
|                                              |              |              |              | 6                      | -1.015422000 | 3.299439000  | -0.606194000 |
|                                              |              |              |              | 6                      | -2.348901000 | -2.529139000 | -0.604943000 |
|                                              |              |              |              | 6                      | 3.365483000  | -0.769625000 | -0.606564000 |
|                                              |              |              |              | 14                     | -2.928771000 | 3.501918000  | -0.637199000 |
|                                              |              |              |              | 14                     | 0.452727000  | 4.543020000  | -0.637526000 |
|                                              |              |              |              | 6                      | -1.868293000 | 2.118761000  | -0.585255000 |
|                                              |              |              |              | 6                      | 0.353841000  | 2.802932000  | -0.585561000 |
|                                              |              |              |              | 6                      | -1.037131000 | 0.963604000  | -0.558314000 |
|                                              |              |              |              | 6                      | 0.316356000  | 1.380338000  | -0.558524000 |
|                                              |              |              |              | 14                     | -4.159967000 | -1.879523000 | -0.635383000 |
|                                              |              |              |              | 14                     | -1.567556000 | -4.287388000 | -0.636067000 |
|                                              |              |              |              | 6                      | -2.603548000 | -1.095069000 | -0.584527000 |
|                                              |              |              |              | 6                      | -0.899960000 | -2.677383000 | -0.584836000 |
|                                              |              |              |              | 6                      | -1.352804000 | -0.416207000 | -0.558083000 |
|                                              |              |              |              | 6                      | -0.315148000 | -1.379992000 | -0.558231000 |
|                                              |              |              |              | 14                     | 3.708523000  | -2.662800000 | -0.637824000 |
|                                              |              |              |              | 14                     | 4.497510000  | 0.786157000  | -0.637802000 |
|                                              |              |              |              | 6                      | 2.250915000  | -1.707234000 | -0.585716000 |
|                                              |              |              |              | 6                      | 2.769429000  | 0.559305000  | -0.585803000 |
|                                              |              |              |              | 6                      | 1.037640000  | -0.963479000 | -0.558530000 |
|                                              |              |              |              | 6                      | 1.353463000  | 0.417049000  | -0.558627000 |
| <b>3Si<sub>2</sub>(Coronene)<sub>2</sub></b> |              |              |              | <b>3Si<sub>2</sub></b> |              |              |              |
| 6                                            | 1.962622000  | 1.269658000  | 2.270607000  | 6                      | -1.943170000 | 3.409271000  | 1.158353000  |
| 6                                            | -1.956331000 | 1.279353000  | -2.262374000 | 6                      | 1.686707000  | -1.224159000 | 2.252433000  |
| 6                                            | -0.001626000 | -3.922806000 | -0.003081000 | 6                      | -3.981298000 | -2.188301000 | 0.565148000  |
| 14                                           | 1.773364000  | 3.197378000  | 2.122536000  | 14                     | -0.319952000 | 4.438460000  | 1.460489000  |
| 14                                           | 2.974031000  | 0.112732000  | 3.448948000  | 14                     | -3.715143000 | 3.877714000  | 0.525137000  |
| 6                                            | 1.088305000  | 1.838397000  | 1.257518000  | 6                      | -0.728260000 | 2.733471000  | 1.578183000  |
| 6                                            | 1.861608000  | -0.175657000 | 2.125773000  | 6                      | -2.925131000 | 2.360553000  | 0.914867000  |
| 6                                            | 0.472912000  | 0.772272000  | 0.535591000  | 6                      | -0.960997000 | 1.326804000  | 1.577149000  |
| 6                                            | 0.947196000  | -0.461407000 | 1.067042000  | 6                      | -2.309293000 | 1.097747000  | 1.179984000  |
| 14                                           | -1.764323000 | 3.206233000  | -2.108841000 | 14                     | 2.997859000  | 0.182765000  | 2.542820000  |
| 14                                           | -2.969948000 | 0.127283000  | -3.443807000 | 14                     | 1.811738000  | -3.148678000 | 2.144143000  |
| 6                                            | -1.080894000 | 1.843832000  | -1.247875000 | 6                      | 1.281863000  | 0.175557000  | 2.190056000  |
| 6                                            | -1.857177000 | -0.166519000 | -2.122120000 | 6                      | 0.500106000  | -2.002258000 | 1.934995000  |
| 6                                            | -0.466752000 | 0.774624000  | -0.529421000 | 6                      | -0.096615000 | 0.228602000  | 1.832622000  |
| 6                                            | -0.942861000 | -0.456753000 | -1.064534000 | 6                      | -0.576850000 | -1.105138000 | 1.679275000  |
| 14                                           | -1.216803000 | -4.672532000 | -1.310853000 | 14                     | -3.409549000 | -4.050017000 | 0.545484000  |
| 14                                           | 1.211460000  | -4.678605000 | 1.303033000  | 14                     | -5.612267000 | -1.293035000 | 0.015578000  |
| 6                                            | -0.775973000 | -3.040305000 | -0.866426000 | 6                      | -2.638139000 | -2.534599000 | 1.003607000  |
| 6                                            | 0.774890000  | -3.044206000 | 0.862355000  | 6                      | -4.056137000 | -0.735746000 | 0.611680000  |
| 6                                            | -0.473102000 | -1.686103000 | -0.531209000 | 6                      | -1.923250000 | -1.331627000 | 1.285852000  |
| 6                                            | 0.475259000  | -1.688488000 | 0.530360000  | 6                      | -2.791599000 | -0.229302000 | 1.046020000  |
| 6                                            | -4.263944000 | -3.255348000 | 0.366486000  | 6                      | 1.941693000  | 3.409683000  | -1.158612000 |
| 6                                            | -3.447592000 | -2.588270000 | 1.320685000  | 6                      | 3.982242000  | -2.186972000 | -0.565299000 |
| 6                                            | -3.416729000 | -1.171187000 | 1.323087000  | 6                      | -1.686273000 | -1.225376000 | -2.251956000 |
| 6                                            | -4.190423000 | -0.440624000 | 0.376023000  | 14                     | 3.713425000  | 3.878845000  | -0.525131000 |
| 6                                            | -4.987880000 | -1.132073000 | -0.571219000 | 14                     | 0.318326000  | 4.438280000  | -1.461802000 |
| 6                                            | -5.004205000 | -2.553748000 | -0.549533000 | 6                      | 2.923989000  | 2.361367000  | -0.914772000 |
| 6                                            | -2.607889000 | -0.477718000 | 2.267925000  | 6                      | 0.727099000  | 2.733324000  | -1.578529000 |
| 6                                            | -4.155869000 | 0.983764000  | 0.375838000  | 6                      | 2.308673000  | 1.098271000  | -1.179710000 |
| 6                                            | -3.351525000 | 1.677212000  | 1.325672000  | 6                      | 0.960355000  | 1.326736000  | -1.577100000 |
| 6                                            | -2.580423000 | 0.945865000  | 2.274240000  | 14                     | 5.612907000  | -1.291017000 | -0.015736000 |
| 6                                            | -3.312848000 | 3.094865000  | 1.323737000  | 14                     | 3.411934000  | -4.048973000 | -0.546027000 |
| 6                                            | -4.077624000 | 3.799086000  | 0.354148000  | 6                      | 4.056424000  | -0.734400000 | -0.611529000 |
| 6                                            | -4.853843000 | 3.131423000  | -0.562629000 | 6                      | 2.639240000  | -2.533990000 | -1.003584000 |
| 6                                            | -4.918493000 | 1.711871000  | -0.574075000 | 6                      | 2.791565000  | -0.228560000 | -1.045672000 |
| 6                                            | -5.702714000 | 0.995663000  | -1.518077000 | 6                      | 1.923730000  | -1.331294000 | -1.285549000 |
| 6                                            | -5.735662000 | -0.378298000 | -1.516669000 | 14                     | -1.810742000 | -3.149836000 | -2.143335000 |
| 1                                            | -6.346554000 | -0.912252000 | -2.249353000 | 14                     | -2.998063000 | 0.180952000  | -2.542535000 |
| 1                                            | -6.283761000 | 1.557960000  | -2.253580000 | 6                      | -0.499392000 | -2.002995000 | -1.934494000 |

|   |              |              |              |   |              |              |              |
|---|--------------|--------------|--------------|---|--------------|--------------|--------------|
| 1 | -4.289536000 | -4.348581000 | 0.372160000  | 6 | -1.282034000 | 0.174514000  | -2.189872000 |
| 1 | -5.621699000 | -3.082734000 | -1.280142000 | 6 | 0.577209000  | -1.105397000 | -1.678939000 |
| 1 | -4.042706000 | 4.891749000  | 0.349952000  | 6 | 0.096438000  | 0.228139000  | -1.832471000 |
| 1 | -5.435541000 | 3.690243000  | -1.300276000 |   |              |              |              |
| 6 | -2.652495000 | -3.293150000 | 2.264924000  |   |              |              |              |
| 6 | -1.867657000 | -2.625599000 | 3.168911000  |   |              |              |              |
| 6 | -1.826032000 | -1.205212000 | 3.200209000  |   |              |              |              |
| 1 | -2.670174000 | -4.386064000 | 2.253659000  |   |              |              |              |
| 1 | -1.254160000 | -3.182536000 | 3.881538000  |   |              |              |              |
| 6 | -1.026955000 | -0.488765000 | 4.131646000  |   |              |              |              |
| 6 | -1.008285000 | 0.881754000  | 4.144435000  |   |              |              |              |
| 6 | -1.781263000 | 1.635508000  | 3.220203000  |   |              |              |              |
| 1 | -0.416463000 | -1.053572000 | 4.840623000  |   |              |              |              |
| 1 | -0.384417000 | 1.416456000  | 4.865313000  |   |              |              |              |
| 6 | -2.506110000 | 3.762293000  | 2.285969000  |   |              |              |              |
| 1 | -2.481103000 | 4.855109000  | 2.282654000  |   |              |              |              |
| 6 | -1.771910000 | 3.057382000  | 3.204088000  |   |              |              |              |
| 1 | -1.158780000 | 3.585336000  | 3.939643000  |   |              |              |              |
| 6 | 2.646713000  | -3.288759000 | -2.274607000 |   |              |              |              |
| 6 | 3.442176000  | -2.586866000 | -1.328468000 |   |              |              |              |
| 6 | 3.413011000  | -1.169737000 | -1.327824000 |   |              |              |              |
| 6 | 2.605653000  | -0.473268000 | -2.271685000 |   |              |              |              |
| 6 | 1.823697000  | -1.197820000 | -3.206196000 |   |              |              |              |
| 6 | 1.863434000  | -2.618314000 | -3.177809000 |   |              |              |              |
| 6 | 4.187263000  | -0.442172000 | -0.378910000 |   |              |              |              |
| 6 | 2.579694000  | 0.950348000  | -2.274766000 |   |              |              |              |
| 6 | 3.350818000  | 1.678701000  | -1.323904000 |   |              |              |              |
| 6 | 4.154101000  | 0.982232000  | -0.375391000 |   |              |              |              |
| 6 | 3.313528000  | 3.096387000  | -1.318652000 |   |              |              |              |
| 6 | 2.508257000  | 3.766873000  | -2.279999000 |   |              |              |              |
| 6 | 1.774295000  | 3.064851000  | -3.200534000 |   |              |              |              |
| 6 | 1.782211000  | 1.643002000  | -3.219939000 |   |              |              |              |
| 6 | 1.009308000  | 0.892177000  | -4.146620000 |   |              |              |              |
| 6 | 1.026379000  | -0.478393000 | -4.136835000 |   |              |              |              |
| 1 | 0.415919000  | -1.040917000 | -4.847657000 |   |              |              |              |
| 1 | 0.386764000  | 1.429188000  | -4.866930000 |   |              |              |              |
| 1 | 2.662947000  | -4.381714000 | -2.265561000 |   |              |              |              |
| 1 | 1.249750000  | -3.172977000 | -3.892048000 |   |              |              |              |
| 1 | 2.484350000  | 4.859702000  | -2.274152000 |   |              |              |              |
| 1 | 1.162481000  | 3.595146000  | -3.935500000 |   |              |              |              |
| 6 | 4.257613000  | -3.256970000 | -0.375610000 |   |              |              |              |
| 6 | 4.998801000  | -2.558250000 | 0.541838000  |   |              |              |              |
| 6 | 4.984103000  | -1.136608000 | 0.566659000  |   |              |              |              |
| 1 | 4.281806000  | -4.350218000 | -0.383592000 |   |              |              |              |
| 1 | 5.615733000  | -3.089554000 | 1.271239000  |   |              |              |              |
| 6 | 5.732844000  | -0.385808000 | 1.513702000  |   |              |              |              |
| 6 | 5.701161000  | 0.988183000  | 1.518402000  |   |              |              |              |
| 6 | 4.917425000  | 1.707334000  | 0.576261000  |   |              |              |              |
| 1 | 6.343466000  | -0.922087000 | 2.244915000  |   |              |              |              |
| 1 | 6.282891000  | 1.548209000  | 2.255100000  |   |              |              |              |
| 6 | 4.078598000  | 3.797563000  | -0.347105000 |   |              |              |              |
| 1 | 4.044697000  | 4.890245000  | -0.340284000 |   |              |              |              |
| 6 | 4.854036000  | 3.126979000  | 0.568227000  |   |              |              |              |
| 1 | 5.436186000  | 3.683517000  | 1.307243000  |   |              |              |              |

## References

- 1 M. Contreras, E. Osorio, F. Ferraro, G. Puga, K. J. Donald, J. G. Harrison, G. Merino and W. Tiznado, *Chemistry-A European Journal*, 2013, **19**, 2305–2310.
- 2 C. Adamo and V. Barone, *J. Chem. Phys.*, 1999, **110**, 6158.
- 3 S. Grimme, S. Ehrlich and L. Goerigk, *J. Comput. Chem.*, 2011, **32**, 1456–1465.
- 4 E. van Lenthe, E. J. Baerends and J. G. Snijders, *J. Chem. Phys.*, 1994, **101**, 9783–9792.
- 5 E. van Lenthe and E. J. Baerends, *J. Comput. Chem.*, 2003, **24**, 1142–1156.
- 6 ADF2012, SCM, Theoretical Chemistry, Vrije Universiteit, Amsterdam The Netherlands, [Http://www.scm.com](http://www.scm.com).
- 7 O. Yañez, R. Báez-Grez, D. Inostroza, W. A. Rabanal-León, R. Pino-Rios, G. Garza, W. Tiznado, J. Garza and W. Tiznado, *J. Chem. Theory Comput.*, 2018, **15**, 1463–1475.
- 8 C. Adamo and V. Barone, *J. Chem. Phys.*, 1999, **110**, 6158–6170.
- 9 S. Grimme, J. Antony, S. Ehrlich and H. Krieg, *J Chem Phys*, 2010, **132**, 154104.
- 10 F. Weigend and R. Ahlrichs, *Physical Chemistry Chemical Physics*, 2005, **7**, 3297–3305.
- 11 J.-D. Chai and M. Head-Gordon, *Phys. Chem. Chem. Phys.*, 2008, **10**, 6615–6620.
- 12 D. Y. Zubarev and A. I. Boldyrev, *Phys. Chem. Chem. Phys.*, 2008, **10**, 5207–5217.
- 13 D. Y. Zubarev and A. I. Boldyrev, *J. Org. Chem.*, 2008, **73**, 9251–9258.
- 14 H. Fliegl, S. Taubert, O. Lehtonen and D. Sundholm, *Phys. Chem. Chem. Phys.*, 2011, **13**, 20500–20518.
- 15 J. Jusélius, D. Sundholm and J. Gauss, *J. Chem. Phys.*, 2004, **121**, 3952–3963.
- 16 K. Wolinski, J. F. Hinton and P. Pulay, *J. Am. Chem. Soc.*, 1990, **112**, 8251–8260.
- 17 Ahrens, J., Geveci, B. and Law, C. (2005) Paraview: An End-User Tool for Large Data Visualization. *The Visualization Handbook*, 717-731.
- 18 U. Ayachit, *The ParaView Guide: A Parallel Visualization Application*, Kitware, Inc., USA, 2015.
- 19 M. J. Frisch, G. W. Trucks, H. B. Schlegel, G. E. Scuseria, M. A. Robb, J. R. Cheeseman, G. Scalmani, V. Barone, G. A. Petersson, H. Nakatsuji, X. Li, M. Caricato, A. V. Marenich, J. Bloino, B. G. Janesko, R. Gomperts, B. Mennucci, H. P. Hratchian, J. V. Ortiz, A. F. Izmaylov, J. L. Sonnenberg, D. Williams-Young, F. Ding, F. Lipparini, F. Egidi, J. Goings, B. Peng, A. Petrone, T. Henderson, D. Ranasinghe, V. G. Zakrzewski, J. Gao, N. Rega, G. Zheng, W. Liang, M. Hada, M. Ehara, K. Toyota, R. Fukuda, J. Hasegawa, M. Ishida, T. Nakajima, Y. Honda, O. Kitao, H. Nakai, T. Vreven, K. Throssell, J. A. Montgomery Jr., J. E. Peralta, F. Ogliaro, M. J. Bearpark, J. J. Heyd, E. N. Brothers, K. N. Kudin, V. N. Staroverov, T. A. Keith, R. Kobayashi, J. Normand, K. Raghavachari, A. P. Rendell, J. C. Burant, S. S. Iyengar, J. Tomasi, M. Cossi, J. M. Millam, M. Klene, C. Adamo, R. Cammi, J. W. Ochterski, R. L. Martin, K. Morokuma, O. Farkas, J. B. Foresman and D. J. Fox, *Gaussian 16, Revis. B.01*, Gaussian, Inc., Wallingford CT, 2016.
